# Optimizing antiviral treatment for seasonal influenza in the United States: A Mathematical Modeling Analysis

Matan Yechezkel, MSc<sup>1\*</sup>, Martial L Ndeffo Mbah, Ph.D.<sup>2,3\*</sup>✉, Dan Yamin, Ph.D.<sup>1\*</sup>✉

<sup>1</sup>Department of Industrial Engineering, Tel Aviv University, 55 Haim Levanon St, Tel Aviv, Israel

<sup>2</sup>College of Veterinary Medicine & Biomedical Sciences and <sup>3</sup>School of Public Health, Texas A&M University, College Station, Texas, 77843

## ✉ Corresponding authors contact information:

Martial Ndeffo-Mbah, PhD  
College of Veterinary Medicine and Biomedical Sciences  
Texas A&M University  
Email: [mndeffo@cvm.tamu.edu](mailto:mndeffo@cvm.tamu.edu),

Dan Yamin, PhD  
Department of Industrial Engineering  
Tel Aviv University  
Email: [dan.yamin@gmail.com](mailto:dan.yamin@gmail.com)

\* Authors equally contributed to the manuscript

**Keywords:** Seasonal Influenza; Antiviral treatment; Vaccination; Mathematical modeling

**Words count:** 3000 words

## **Abstract**

Seasonal influenza remains a major health burden in the United States. Despite recommendations of early antiviral treatment of high-risk patients, the effective treatment coverage remains very low. We developed an influenza transmission model that incorporates data on infectious viral load, social contact, and healthcare-seeking behavior, to evaluate the population-level impact of increasing antiviral treatment timeliness and coverage among high-risk patients in the US. We found that increasing the rate of early treatment among high-risk patients who received treatment more than 48 hours after symptoms onset, would substantially avert infections and influenza-induced hospitalizations. We found that treatment of the elderly has the highest impact on reducing hospitalizations, whereas treating high-risk individuals aged 5-19 years old has the highest impact on transmission. The population-level impact of increased timeliness and coverage of treatment among high-risk patients was observed regardless of seasonal influenza vaccination coverage and the severity of the influenza season.

## **Introduction**

Seasonal influenza continues to be a major cause of health and economic burden (Molinari et al., 2007). Although influenza infection is generally a self-limiting disease, it can result in severe illness and death. In particular, the disease carries substantial health burden among young children, the elderly, and people with certain health conditions (Fiore et al., 2010; Monto, 2008). In the United States, seasonal influenza results in an estimated incidence of 9.3–49.0 million illnesses, 140,000–710,000 hospitalizations, and 12,000–56,000 deaths annually (Molinari et al., 2007; Tokars et al., 2018a).

Vaccination is the mainstay of efforts to reduce the burden of seasonal influenza. The US Advisory Committee on Immunization Practices (ACIP) recommends influenza vaccination for all individuals aged six months or older. However, the majority of the US population does not comply with these recommendations, and vaccination rates against seasonal influenza hover around approximately 40% annually (Chiu et al., 2017). Additionally, due to the rapid mutation of the virus and an imperfect match between the vaccine's virus cocktail, vaccine efficacy is not complete and varies widely by season. For example, the average influenza vaccine effectiveness was estimated to be 45% in the US, with the annual value ranging between 19% and 60% over the past decade ("CDC Seasonal Flu Vaccine Effectiveness Studies | CDC," n.d.; Doyle et al., 2019).

Recently, increased severity of influenza, marked by high rates of outpatient and inpatient visits, has been observed among patients with high-risk influenza-associated complications (Garten et al., 2018; Xu et al., 2019). This group includes children under five years old, adults over 65 years old, American Indian/Alaska natives, pregnant women, people with immunosuppression, people who are morbidly obese, people with chronic pulmonary or cardiovascular conditions, and people with diabetes (Fiore et al., 2011). This high-risk population accounts for the bulk of influenza-associated hospitalizations in the US. For example, more than 50% of all influenza-associated hospitalizations in the US occur among adults over 65 years old, and more than 70% of adult inpatients have at least one underlying medical condition that placed them at high risk for influenza-associated complications (Appiah et al., 2015; Blanton et al., 2017; Davlin et al., 2016; Garten et al., 2018).

The increase in influenza-associated hospitalization and mortality ("Influenza-associated Pediatric Mortality," n.d.; Xu et al., 2019) has raised concerns about vaccine uptake and early

treatment of patients at risk of severe complications (Ison, 2018; O’Halloran et al., 2016). Neuraminidase inhibitors (NAIs) are a class of antiviral medications recommended for the pharmacologic treatment of influenza (Fiore et al., 2011). Early therapy of influenza patients with NAIs reduces the duration and intensity of viral shedding, the duration of symptoms, and disease-associated complications, hospitalizations, and mortality (Hayden and Pavia, 2006). Despite the high burden of influenza-induced complications among high-risk individuals, their rate of treatment for influenza infection has remained low (Stewart et al., 2018). Approximately 40% of high-risk patients with laboratory-confirmed influenza seek care within two days of symptoms onset (Stewart et al., 2018). Among these patients, on average, 37% are prescribed an antiviral medication (Biggerstaff et al., 2014; Stewart et al., 2018). The ACIP guidelines recommend that antiviral treatment be given to high-risk patients with clinically suspected influenza infection, even with deferred laboratory confirmation, when influenza is known to be circulating in the population (Fiore et al., 2011). However, current clinical practice is far from keeping with these guidelines.

Antiviral treatment not only provides direct benefits to treated patients by reducing their risk of influenza-induced hospitalization and/or mortality but may also provide indirect protection to noninfected individuals by reducing their risk of infection. This indirect benefit is achieved by decreasing the contribution of treated patients to disease transmission by reducing their viral shedding and duration of infectiousness. Household-based trials have shown that early treatment of infected individuals with NAIs may reduce their contribution to disease transmission by 50 – 80% (E. et al., 2009; Halloran et al., 2007).

To evaluate the population-level impact of increased antiviral treatment coverage and timeliness of influenza-infected high-risk individuals during influenza seasons, we developed

a data-driven influenza transmission model that incorporates data on infectious viral load, social contact, healthcare-seeking behavior, time to seek healthcare, and antiviral treatment.

## **Methods**

**Model Overview.** We developed a dynamic model for influenza infection progression and transmission in Texas, California, Connecticut, and Virginia. Our model is a modified susceptible-infected-recovered compartmental framework (Vynnycky and White, 2010), in which transitions between the health-related compartments occur over time (Figure 1). To model age-dependent transmission, we stratified the population into five age groups: 0–4 y, 5–19 y, 20–49 y, 50–64 y, and  $\geq 65$  y. We also distinguished between high-risk and low-risk individuals for each age group based on the ACIP case definition (Fiore et al., 2011).

Susceptible individuals in the model may interact with infectious individuals and become either asymptotically or symptomatically infected (Furuya-Kanamori et al., 2016; Leung et al., n.d.), where they can transmit the disease to others until recovery. Consistent with previous models (Medlock and Galvani, 2009; Ndeffo Mbah et al., 2013; Yamin et al., 2014), we assumed that upon recovery, individuals are fully protected for the entire season. This assumption is supported by prospective studies demonstrating that reinfection in the same season is rare (Möst et al., 2019; Möst and Weiss, 2016).

**Force of Infection.** The rate at which infectious individuals transmit depends on 1) age-specific contact rates (Table supplementary S1) between an infected individual and his or her contacts, 2) age-specific susceptibility to infection, and 3) infectiousness of the infected individual based on her/his daily viral loads and time in the season (Figure supplementary S1, and SI Appendix for details).

In the US, influenza incidence is seasonal, with a peak typically striking in the winter, yet the driver for this seasonality remains uncertain (Lipsitch and Viboud, 2009). Thus, we included general seasonal variation in the susceptibility rate of the model as  $T(t) = \left(1 + \cos \left[ \frac{2\pi(t-\phi)}{365} \right] \right)$ , where  $\phi$  is a seasonal offset. This formulation was previously shown to accurately capture the seasonal variation in the incidence of respiratory diseases by US state (Pitzer et al., 2015; Yamin et al., 2016).

**Hospitalizations.** Hospitalization was not model explicitly. However, we computer the number of hospitalizations for each age and risk-group by multiplying the number of symptomatic infected individuals by the rate of hospitalization given influenza infection. These age- and risk-specific rates were obtained from epidemiological studies (Pitzer et al., 2015; Yamin et al., 2016).

**Baseline Vaccination and Treatment.** For each year, we parameterized vaccination uptake from state-specific influenza vaccine coverage data for different age groups, as observed from 2013 to 2018 (Table supplementary S2) (“2010-11 through 2018-19 Influenza Seasons Vaccination Coverage Trend Report | FluVaxView | Seasonal Influenza (Flu) | CDC,” n.d.). We estimated vaccine efficacy using the CDC estimates for influenza vaccine efficacy between 2013 and 2018 (“CDC Seasonal Flu Vaccine Effectiveness Studies | CDC,” n.d.).

Antiviral treatment is provided to high-risk individuals who seek care in health clinics and hospitals. We parameterized our model using data from recent large-scale studies on the time to seek care and antiviral prescription among laboratory-confirmed high-risk influenza patients in the US (Biggerstaff et al., 2014). These data were used to inform our baseline treated scenario for each state.

High-risk individuals receiving antiviral treatment have a reduced rate of hospitalization compared to nontreated high-risk patients. The age-specific reduction in hospitalization rate among treated high-risk individuals was obtained from previous retrospective and prospective studies (Kaiser et al., 2003; Piedra et al., 2009).

**Model Calibration.** We calibrated our model to weekly cases of influenza (confirmed by viral isolation, antigen detection, or PCR) and influenza-like illnesses (ILI) cases reported (“FluView Interactive | CDC,” n.d.) to estimate empirically unknown epidemiological parameters (SI Appendix, Tables supplementary S3 and S4). These data were collected by the CDC’s National Respiratory and Enteric Virus Surveillance System and state health departments from 2014 to 2019. We used data from a recent meta-analysis (Tokars et al., 2018a) of seasonal influenza in the US between 2011 and 2016 to obtain the median annual attack rate per age group.

**Interventions.** We evaluated two interventions for increasing the number of high-risk patients seeking care and being treated within the first two days. In the first intervention, we increased the number of individuals who are treated within the first two days of symptoms onset by assuming that a proportion of those who received treatment after the first two days of symptoms onset would receive treatment within the first two days of symptoms onset. In the second intervention, we increased the total number of infected high-risk individuals who received treatment while assuming that they all received treated within the first two days of symptoms onset. We evaluated the population- and individual-level benefits of these interventions in terms of infections and hospitalizations averted in during a single influenza season.

**Sensitivity Analysis.** We conducted sensitivity analyses to examine the robustness of our results. In the first analysis, we investigated the impact of effective vaccination coverage on the effectiveness of antiviral treatment. Effective vaccination coverage is defined as the product of vaccine efficacy times vaccine coverage, and represents the level of vaccine induced immunity in the population. In the second analysis, we conducted a two-way sensitivity analysis to investigate the joint impact of changing both the attack rate and the effective vaccination coverage.

## **Results**

The transmission model was calibrated to age-stratified weekly incidence data for the 2014-2015 to 2018-2019 influenza seasons in four states across the US (Figure 1 and figure supplementary S2). The model explicitly accounted for changes in transmissibility with disease progression and timing of antiviral treatment. The model captures the influenza weekly trends and the age distribution of infected individuals (Figure 1 B-E and SI Appendix). For example, in influenza season 2014-2015, the calibrated model accurately showed that influenza infections peaked in week 14 in Texas and week 17 in California, week 19 in Connecticut and week 20 in Virginia (Figure 1 and figure supplementary S2), and the age distributions of influenza cases were consistent with the empirical data in both states (Figure 1 and figure supplementary S2).



A

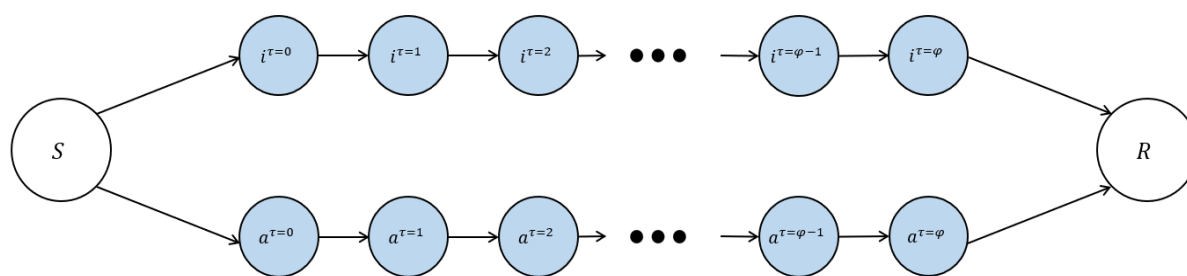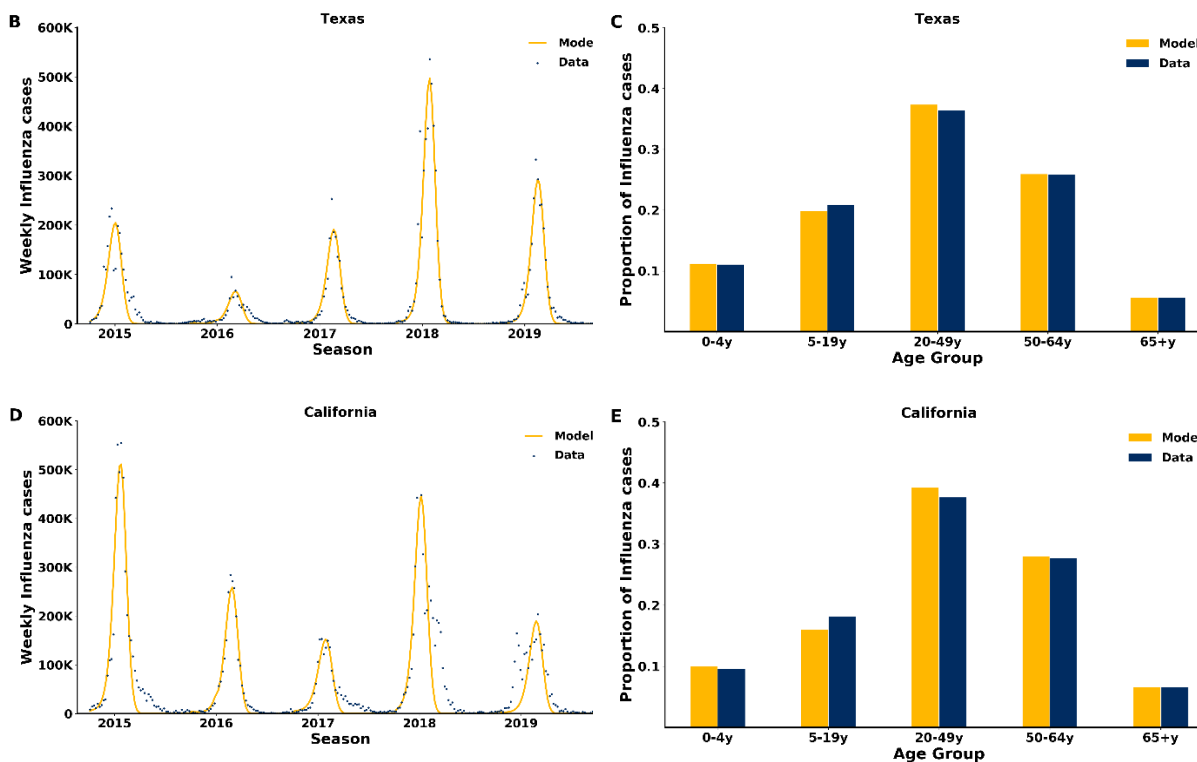

**Figure 1. Structure and fit of the model.** (A) Compartmental diagram of the transmission model. Following exposure, susceptible individuals  $S$  move to the symptomatic or asymptomatic compartment,  $i^{\tau=0}, a^{\tau=0}$ , representing the first day of infection. Then, on each following day, they transition to a matching compartment, where they may transmit the disease to others based on 1) their contact mixing patterns, 2) the per-day viral load, 3) the seasonal forcing, and 4) their antiviral treatment regimen. Recovered individuals move to compartment  $R$ , where they are fully protected for the entire season. For clarity, age and risk stratification are not displayed (*SI Appendix*). (B, D) Time series of recorded weekly influenza cases and model fit to California and Texas (the model fit to Connecticut and Virginia is provided in *SI Appendix*, figure supplementary S2). (C, E) Data and model fit to the age distribution among influenza infections.

We simulated five influenza seasons and projected the number of cases and influenza-induced hospitalization that would have been averted by early treatment. Specifically, we evaluated the population-level benefit of increasing the proportion of high-risk individuals who initiate treatment within 48 hours of symptoms onset without increasing the baseline

number of treated individuals (Figure 2 and figure supplementary S3). We found that keeping the same number of treatments while providing earlier treatment can substantially decrease transmission, thereby reducing both influenza illnesses and hospitalizations. For example, if 60% of high-risk patients who actually received treatment more than 48 hours after symptoms onset were treated earlier, it would avert an additional 58,482 (45,066-74,997) cases and 502 (353-752) hospitalizations annually (Figure 2 A and B) in Texas, 81,472 (66,527-100,836) cases and 743 (579-998) hospitalizations in California (Figure 2 C and D), 6,303 (5,662-9,144) case and 57 (50-90) hospitalizations in Connecticut (Figure supplementary S3 E and F), and 16,380 (13,995-18,386) cases and 140 (117-161) hospitalizations in Virginia (Figure supplementary S3 G and H) . If all patients were treated within 48 hours of symptoms onset, it would avert an additional 65,210 (50,206-83,713) cases and 543 (382-811) hospitalizations annually in Texas, 90,842 (74,126-112,531) cases and 805 (627-1,080) hospitalizations in California, 7,012 (6,297-10,187) cases and 62 (54-98) hospitalizations in Connecticut, and 18,230 (15,567-20,471) cases and 152 (127 - 175) hospitalizations in Virginia (Figure 2 and figure supplementary S3).

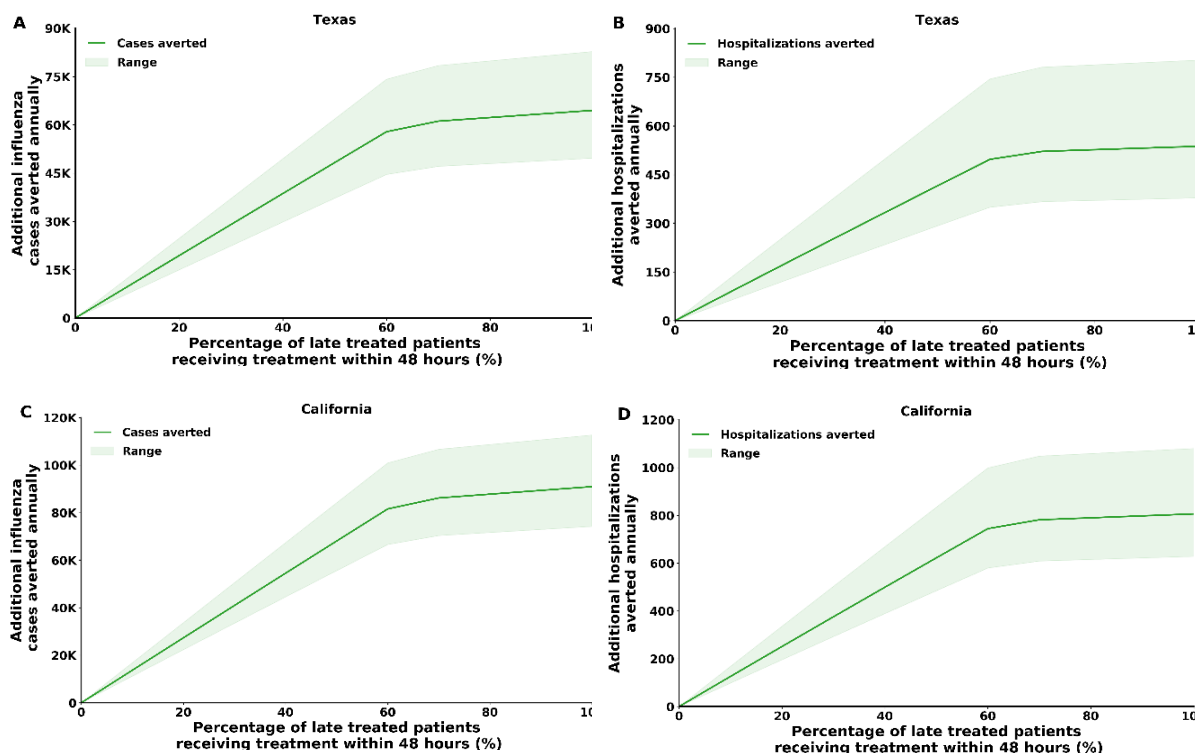

**Figure 2.** Model projection of additional influenza cases and hospitalizations averted annually in California and Texas by increasing the number of high-risk patients who initiate treatment within 48 hours of symptoms onset. Here, a proportion of high-risk patients who initiated antiviral treatment more than 48 hours after symptoms onset was assumed to receive treatment earlier. (A, C) Total number of infection cases averted. (B, D) Total number of hospitalizations averted.

We also evaluated the benefit of increasing antiviral treatment coverage among high-risk individuals. Increasing early treatment coverage among individuals at high risk has a substantial benefit in terms of averting both cases and hospitalizations (Figure 3 and figure supplementary S4). For example, if 20% of high-risk individuals infected with influenza were treated within 48 hours of symptoms onset, it would avert, on average, 115,641 influenza cases annually in Texas, 160,645 cases in California, 12,571 cases in Connecticut, and 32,494 cases in Virginia. In addition to cases averted, this increase in treatment coverage would avert, on average, 1,068 hospitalizations annually in Texas, 1,587 hospitalizations in California, 121 hospitalizations in Connecticut, and 295 hospitalizations in Virginia.

Given that the benefit of treatment depends on the underlying vaccination coverage within the population, we also examined how variation in vaccination coverage affects the benefit of treating high-risk individuals. We found that increasing effective vaccination coverage would decrease both influenza burden and the benefit of treatment (Figure 3). Nevertheless, for a 20% increase in influenza effective vaccination coverage among all age groups, our results suggest that the benefit of treatment remains substantial (Figure 3). For example, treating 20% of infected high-risk individuals within 48 hours of symptoms onset would avert 65,018 cases and 519 hospitalizations in Texas (Figure 3 A and C). In California, it would avert 87,243 cases and 766 hospitalizations (Figure 3 B and D). In Connecticut, it would avert 4,621 cases and 40 hospitalizations, and in Virginia it would avert 12,347 cases and 100 hospitalizations (Figure supplementary S4).

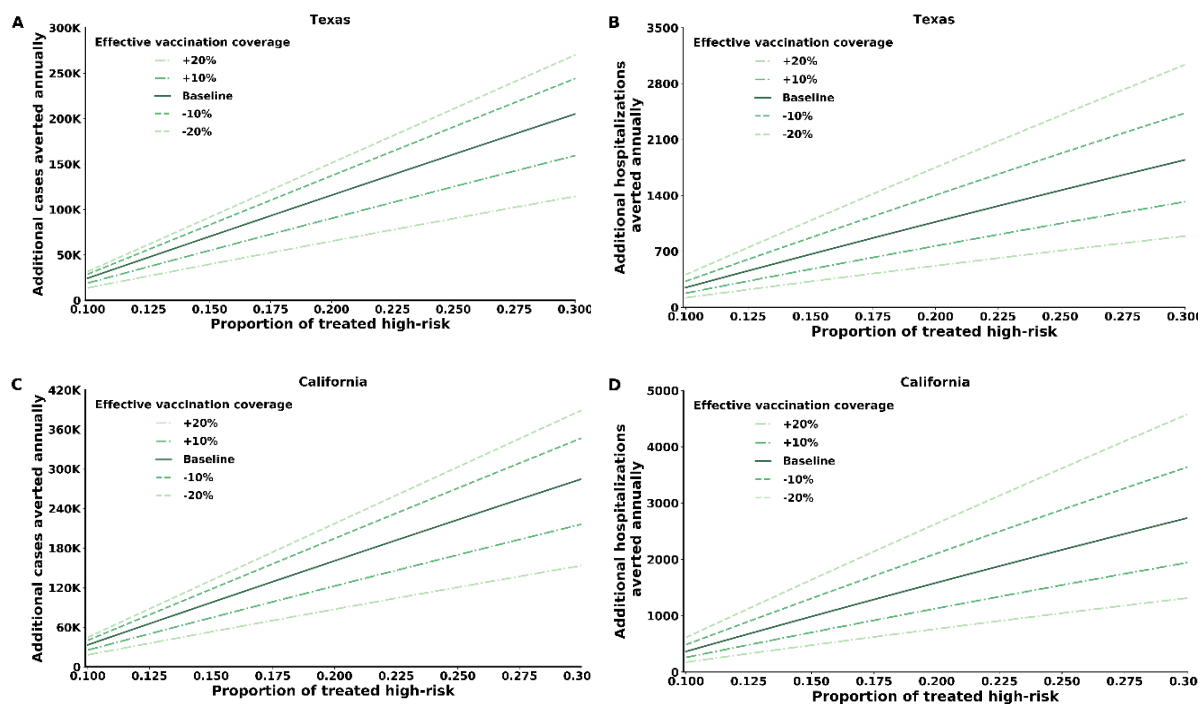

**Figure 3.** Model projections of influenza cases and hospitalizations averted in California and Texas by increasing the portion of treated high-risk individuals who seek care and receive treatment within 48 hours of symptoms onset. For the sensitivity analysis, we increased and decreased the vaccination coverage by 10 and 20 percent. (A, C) Total number of cases averted. (B, D) Total number of hospitalizations averted.

To estimate the benefits of a policy that targets specific age groups for early treatment, we evaluated the effectiveness of age-targeted treatment strategies for averting influenza cases and influenza-induced hospitalizations (Figure 4 and figure supplementary S5). We found that treatment of the elderly (>65 years old) has the highest impact on reducing hospitalizations (Figure 4 B and D). This result was driven mainly by the fact that this age group has the highest risk for influenza complications, which leads to a higher rate of hospitalization. The highest impact on reducing transmission was achieved by targeting high-risk individuals aged 5-19 years old. For example, in Texas, early treatment of the 5-19 years old age group will avert 2.31 cases per treatment, and early treatment of the >65 years old age group will avert 0.04 hospitalizations per treatment.

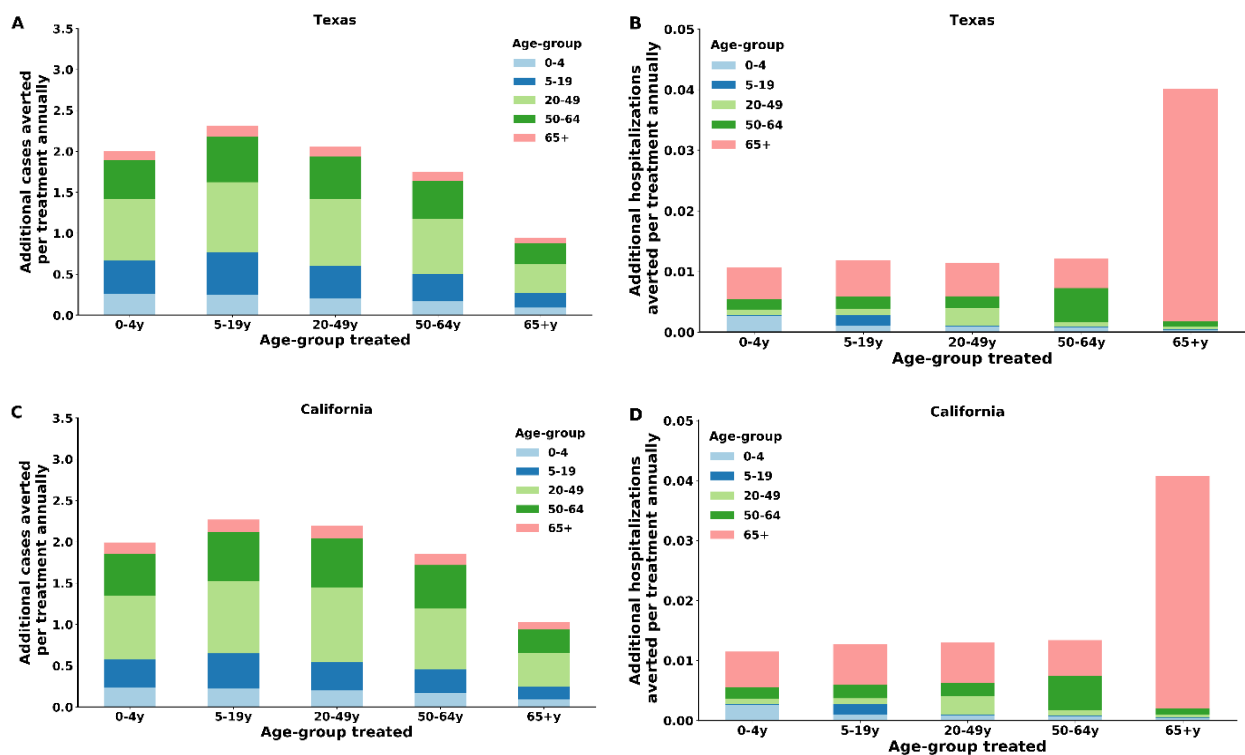

**Figure 4.** Model projections of influenza cases and hospitalizations averted per treatment by treating each age group within 48 hours of symptoms onset in California and Texas. (A, C) Number of cases averted per treatment for each age group stratified by age group. (B, D) Number of hospitalizations averted per treatment for each age group stratified by age group.

The yearly attack rate of influenza varies considerably between seasons. Thus, we explored the benefit of treating high-risk patients under different attack rates and effective vaccination coverage. We found that the benefit conferred by treatment decreases with increasing attack rate and increases with increasing effective vaccination coverage (Figure 5 and figure supplementary S6). With a medium attack rate of 12.03% and 11.86% effective vaccination coverage, which is 60% from the yearly mean effective vaccination coverage, 0.69-0.78 cases are averted per treatment in California. With an attack rate of 5.70% and the same effective vaccination coverage, 0.96-1.11 cases are averted per treatment. For the same transmission settings in Texas, for a yearly attack rate of 15% and 12.11% effective vaccination coverage, 0.49-0.55 cases are averted per treatment. With an attack rate of 2.81% and the same effective vaccination coverage, 1.65-1.81 cases are averted per treatment. In Texas, the benefit conferred by treatment was found to decrease when the effective vaccination coverage exceeds 22.50% (Figure 5C). In all settings considered, the marginal benefit of treatment per dose was found to decrease with increasing treatment coverage and vaccination coverage (Figure 5). This saturation in the benefit of treatment is driven by the increased herd immunity resulting in a decrease in the indirect benefit of treatment.

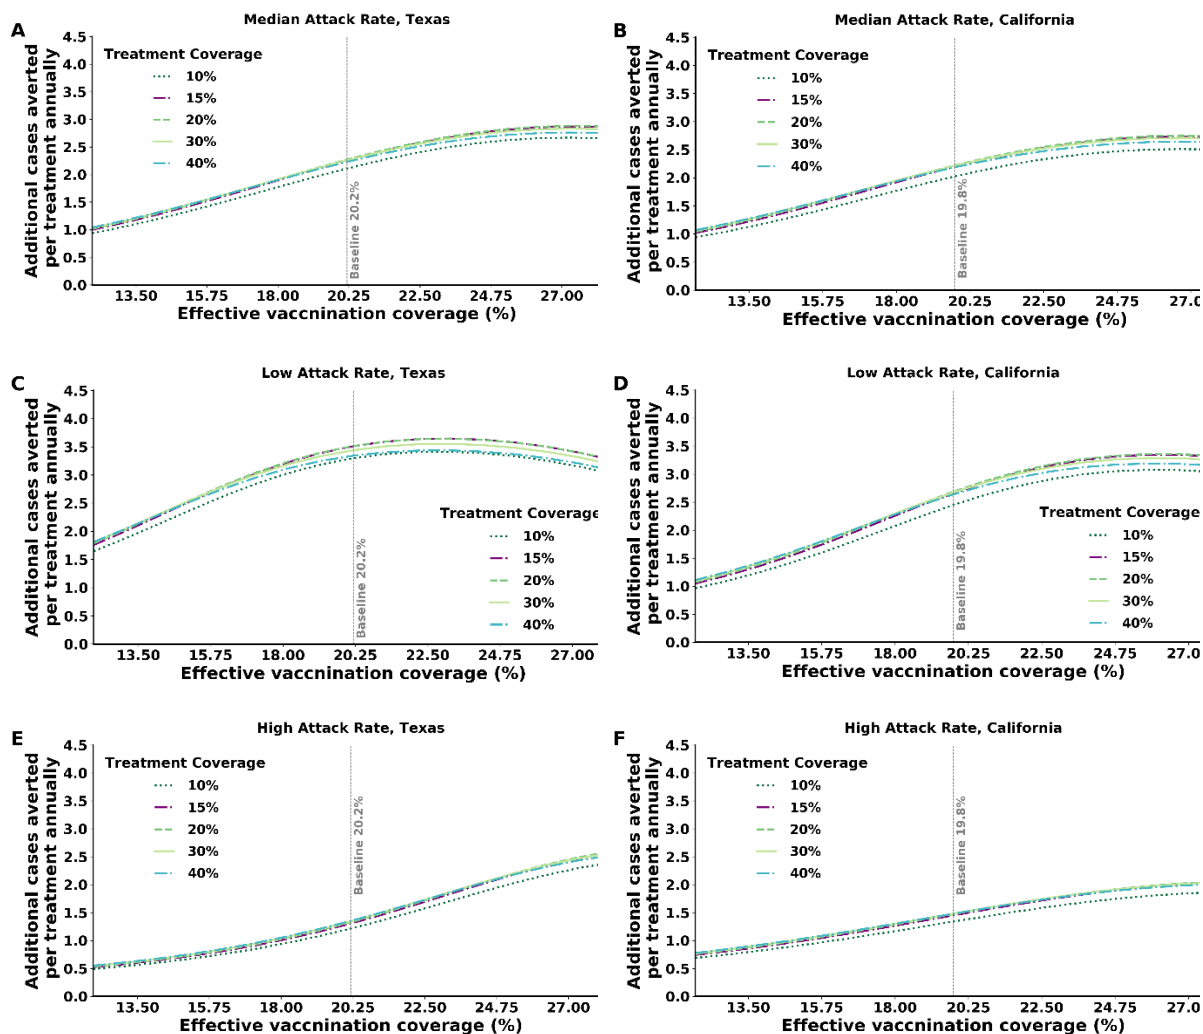

**Figure 5.** The mutual effect of attack rate and vaccination coverage in California and Texas on the number of cases averted per treatment for each treatment coverage among high-risk individuals infected with influenza. Infected high-risk individuals seek care and receive treatment within 48 hours of symptoms onset. (A, B) Median attack rate settings. (C, D) Low attack rate settings. (E, F) High attack rate settings.

## Discussion

Our key finding shows that increasing the timeliness of treatment of high-risk patients, even without increasing the current treatment coverage, is highly effective in reducing morbidity and mortality associated with influenza at the population level. The reason behind this finding is that the viral load of influenza is the highest during the first three days from symptoms onset. Earlier treatment reduces the viral loads and thus has a pivotal nonlinear effect of reducing transmission.

Interventions that could improve the timeliness of high-risk patients seeking care and their access to timely antiviral prescriptions and potentially reduce influenza-associated morbidity and mortality are urgently needed. These interventions could include education of high-risk patients, education of physicians about the benefits of early antiviral treatment among high-risk patients, and innovative tools to enhance early detection of influenza infection and treatment. These tools include providing phone consultations or remote electronic visits (virtual visits).

Vaccination remains the main tool for controlling seasonal influenza. However, vaccine efficacy varies widely between influenza seasons, and vaccination coverage remains suboptimal (“CDC Seasonal Flu Vaccine Effectiveness Studies | CDC,” n.d.; Doyle et al., 2019). Our study shows that the benefit of treating early and increasing the treatment coverage is substantial, regardless of vaccine efficacy and coverage. Counterintuitively, we found that the higher the effective vaccine coverage is, the higher the marginal outcome of treatment. This phenomenon is driven by the fact that high effective vaccination coverage results in low disease transmission, which in turn increases the indirect benefit of treatment. This finding emphasizes the importance of antiviral treatment as a complementary effort to vaccination.

Despite the effectiveness of antivirals in reducing influenza-related morbidity and mortality, the emergence of drug resistance poses a critical limitation on their application. Therefore, parsimonious use of antivirals is needed to mitigate the emergence of influenza antiviral-resistant strains. Studies have suggested that to reduce the risk of antiviral overuse while maximizing their use to mitigate the burden of influenza, low-risk patients should be tested before treatment with antivirals and high-risk patients with clinically diagnosed influenza



infection should receive prompt treatment pending results of a laboratory-confirmed test (Sintchenko et al., 2002). Our study shows that increasing the timeliness of treatment without increasing the number of treated individuals would substantially increase the population-level benefit of antiviral treatment. For example, if the proportion of high-risk patients who receive treatment within the first 48 hours of symptoms onset were to increase from its baseline value of 8.1% to 14.85% (the total number of high-risk patients who receive treatment: both within and after 48 hours), it could avert an additional 65,210 (50,206-83,713) cases annually in Texas, 90,842 (74,126-112,531) cases in California, 7,012 (6,297-10,187) cases in Connecticut, and 18,230 (15,567-20,471) cases in Virginia.

The ongoing coronavirus (COVID-19) pandemic has already put unprecedented strain on the health system of many countries. As the disease continues to unfold across the world, its impact on national health systems is yet to be fully understood. In the US, the possibility of COVID-19 transmission during the next influenza season is raising a substantial concern about the health system being overwhelmed by visits from both COVID-19 and influenza-related complications among high-risk patients. The specter of this challenging scenario emphasizes the importance of the results of this study and the urgent need for increase influenza vaccine uptake and timeliness of antiviral treatment among high-risk patients in the US

Our study includes several limitations that should be addressed by future studies. Although several studies have attempted to estimate the annual attack rate of influenza in the US (Jayasundara et al., 2014; Molinari et al., 2007; Tokars et al., 2018b), the state-level rates remain unknown. Therefore, we used the nationwide attack rate to normalize the state-specific influenza cases. Moreover, we used nationwide data to estimate the treatment

coverage and timeliness for each state, as state-specific data are not available. Under these assumptions, our results were qualitatively similar across all states, with quantitative differences being driven by state-specific information on population size and demography, vaccination coverage, and influenza seasonality.

In conclusion, increasing the timeliness and coverage of antiviral treatment among high-risk individuals has the potential to substantially reduce the burden of seasonal influenza in the US. Timely treatment not only reduces the risk of influenza-induced hospitalization for the treated individual but may also reduce disease transmission. Public health decision makers should invest continuous efforts to follow the CDC guidelines by treating influenza patients at high risk as soon as possible.

**Funding:** This study was supported by a research grant (grant No. 3409/19) from the Israel Science Foundation within the Israel Precision Medicine Partnership program (Dr. Yamin), and a faculty startup funding from Texas A&M College of Veterinary Medicine and Biomedical Sciences (Dr. Ndeffo-Mbah). The funders have no role in the design of the study, collection, analysis, and interpretation of data.

**Conflict of Interest Disclosure:** The authors declare no conflicts of interest

**Acknowledgement:** None

## References

- 2010-11 through 2018-19 Influenza Seasons Vaccination Coverage Trend Report | FluVaxView | Seasonal Influenza (Flu) | CDC. n.d. <https://www.cdc.gov/flu/fluview/reportshtml/trends/index.html>
- Appiah GRD, Blanton L, D’Mello T, Kniss K, Smith S, Mustaqim D, Steffens C, Dhara R, Cohen J, Chaves SS, Bresee J, Wallis T, Xu X, Elal AIA, Gubareva L, Wentworth DE, Katz J, Jernigan D, Brammer L. 2015. Influenza activity — United states, 2014–15 season and composition of the 2015–16 influenza vaccine. *Morb Mortal Wkly Rep*.
- Biggerstaff M, Jhung MA, Reed C, Fry AM, Balluz L, Finelli L. 2014. Influenza-like illness, the time to seek healthcare, and influenza antiviral receipt during the 2010-2011 influenza season - United States. *J Infect Dis*. doi:10.1093/infdis/jiu224
- Blanton L, Alabi N, Mustaqim D, Taylor C, Kniss K, Kramer N, Budd A, Garg S, Cummings CN, Chung J, Flannery B, Fry AM, Sessions W, Garten R, Xu X, Abd Elal

- AI, Gubareva L, Barnes J, Dugan V, Wentworth DE, Burns E, Katz J, Jernigan D, Brammer L. 2017. Update: Influenza activity in the United States during the 2016–17 season and composition of the 2017–18 influenza vaccine. *Morb Mortal Wkly Rep*. doi:10.15585/mmwr.mm6625a3
- CDC Seasonal Flu Vaccine Effectiveness Studies | CDC. n.d. <https://www.cdc.gov/flu/vaccines-work/effectiveness-studies.htm>
- Chiu APY, Dushoff J, Yu D, He D. 2017. Patterns of influenza vaccination coverage in the United States from 2009 to 2015. *Int J Infect Dis*. doi:10.1016/j.ijid.2017.10.004
- Davlin SL, Blanton L, Kniss K, Mustaquim D, Smith S, Kramer N, Cohen J, Cummings CN, Garg S, Flannery B, Fry AM, Grohskopf LA, Bresee J, Wallis T, Sessions W, Garten R, Xu X, Abd Elal AI, Gubareva L, Barnes J, Wentworth DE, Burns E, Katz J, Jernigan D, Brammer L. 2016. Influenza activity - United States, 2015-16 season and composition of the 2016-17 influenza vaccine. *Morb Mortal Wkly Rep*. doi:10.15585/mmwr.mm6522a3
- Doyle JD, Chung JR, Kim SS, Gaglani M, Raiyani C, Zimmerman RK, Nowalk MP, Jackson ML, Jackson LA, Monto AS, Martin ET, Belongia EA, McLean HQ, Foust A, Sessions W, Berman LS, Garten RJ, Barnes JR, Wentworth DE, Fry AM, Patel MM, Flannery B. 2019. Interim Estimates of 2018-19 Seasonal Influenza Vaccine Effectiveness - United States, February 2019. *MMWR Morb Mortal Wkly Rep*. doi:10.15585/mmwr.mm6806a2
- E. G, B.J. C, J.J. O, L. D, V.J. F, A. H, J.C. M, D. R, J. R, P. B, M. L. 2009. Oseltamivir for treatment and prevention of pandemic influenza A/H1N1 virus infection in households, Milwaukee, 2009. *BMC Infect Dis*.
- Fiore AE, Fry A, Shay D, Gubareva L, Bresee JS, Uyeki TM, Centers for Disease Control. 2011. Antiviral agents for the treatment and chemoprophylaxis of influenza --- recommendations of the Advisory Committee on Immunization Practices (ACIP). *MMWR Surveill Summ Morb Mortal Wkly report Surveill Summ / CDC*.
- Fiore AE, Uyeki TM, Broder K, Finelli L, Euler GL, Singleton JA, Iskander JK, Wortley PM, Shay DK, Bresee JS, Cox NJ. 2010. Prevention and control of influenza with vaccines: Recommendations of the Advisory Committee on Immunization Practices (ACIP), 2010. *Morb Mortal Wkly Rep*. doi:10.1097/00019048-200203000-00014
- FluView Interactive | CDC. n.d. <https://www.cdc.gov/flu/weekly/fluviewinteractive.htm>
- Furuya-Kanamori L, Cox M, Milinovich GJ, Soares Magalhaes RJ, Mackay IM, Yakob L. 2016. Heterogeneous and dynamic prevalence of asymptomatic influenza virus infections. *Emerg Infect Dis* 22:1052–1056. doi:10.3201/eid2206.151080
- Garten R, Blanton L, Elal AIA, Alabi N, Barnes J, Biggerstaff M, Brammer L, Budd AP, Burns E, Cummings CN, Davis T, Garg S, Gubareva L, Jang Y, Kniss K, Kramer N, Lindstrom S, Mustaquim D, O’Halloran A, Sessions W, Taylor C, Xu X, Dugan VG, Fry AM, Wentworth DE, Katz J, Jernigan D. 2018. Update: Influenza activity in the united states during the 2017–18 season and composition of the 2018–19 influenza vaccine. *Morb Mortal Wkly Rep*. doi:10.15585/mmwr.mm6722a4
- Halloran ME, Hayden FG, Yang Y, Longini IM, Monto AS. 2007. Antiviral effects on influenza viral transmission and pathogenicity: Observations from household-based trials. *Am J Epidemiol*. doi:10.1093/aje/kwj362
- Hayden FG, Pavia AT. 2006. Antiviral Management of Seasonal and Pandemic Influenza. *J Infect Dis*. doi:10.1086/507552
- Influenza-associated Pediatric Mortality. n.d. <https://gis.cdc.gov/GRASP/Fluview/PedFluDeath.html>
- Ison MG. 2018. Improving Delivery of Early Treatment to Influenza-Infected Patients. *Clin Infect Dis*. doi:10.1093/cid/cix924
- Jayasundara K, Soobiah C, Thommes E, Tricco AC, Chit A. 2014. Natural attack rate of influenza in unvaccinated children and adults: a meta-regression analysis. *BMC Infect*

- Dis* **14**:670. doi:10.1186/s12879-014-0670-5
- Kaiser L, Wat C, Mills T, Mahoney P, Ward P, Hayden F. 2003. Impact of oseltamivir treatment on influenza-related lower respiratory tract complications and hospitalizations. *Arch Intern Med*. doi:10.1001/archinte.163.14.1667
- Leung NHL, Xu C, Ip DKM, Cowling BJ. n.d. The fraction of influenza virus infections that are asymptomatic: a systematic review and meta-analysis. doi:10.1097/EDE.0000000000000340
- Lipsitch M, Viboud C. 2009. Influenza seasonality: Lifting the fog. *Proc Natl Acad Sci U S A*. doi:10.1073/pnas.0900933106
- Medlock J, Galvani AP. 2009. Optimizing influenza vaccine distribution. *Science* (80- ). doi:10.1126/science.1175570
- Molinari NAM, Ortega-Sanchez IR, Messonnier ML, Thompson WW, Wortley PM, Weintraub E, Bridges CB. 2007. The annual impact of seasonal influenza in the US: Measuring disease burden and costs. *Vaccine*. doi:10.1016/j.vaccine.2007.03.046
- Monto AS. 2008. Epidemiology of influenza. *Vaccine*. doi:10.1016/j.vaccine.2008.07.066
- Möst J, Redlberger-Fritz M, Weiss G. 2019. Multiple Influenza Virus Infections in 4 Consecutive Epidemiological Seasons: A Retrospective Study in Children and Adolescents. *Open Forum Infect Dis*. doi:10.1093/ofid/ofz195
- Möst J, Weiss G. 2016. Consecutive Infections with Influenza A and B Virus in Children during the 2014-2015 Seasonal Influenza Epidemic. *J Infect Dis*. doi:10.1093/infdis/jiw104
- Ndeffo Mbah ML, Medlock J, Meyers LA, Galvani AP, Townsend JP. 2013. Optimal targeting of seasonal influenza vaccination toward younger ages is robust to parameter uncertainty. *Vaccine*. doi:10.1016/j.vaccine.2013.04.052
- O'Halloran AC, Lu PJ, Williams WW, Bridges CB, Singleton JA. 2016. Influenza Vaccination Coverage among People with High-Risk Conditions in the U.S. *Am J Prev Med*. doi:10.1016/j.amepre.2015.06.008
- Piedra PA, Schulman KL, Blumentals WA. 2009. Effects of oseltamivir on influenza-related complications in children with chronic medical conditions. *Pediatrics*. doi:10.1542/peds.2008-0977
- Pitzer VE, Viboud C, Alonso WJ, Wilcox T, Metcalf CJ, Steiner CA, Haynes AK, Grenfell BT. 2015. Environmental Drivers of the Spatiotemporal Dynamics of Respiratory Syncytial Virus in the United States. *PLoS Pathog*. doi:10.1371/journal.ppat.1004591
- Sintchenko V, Gilbert GL, Coiera E, Dwyer D. 2002. Treat or test first? Decision analysis of empirical antiviral treatment of influenza virus infection versus treatment based on rapid test results. *J Clin Virol*. doi:10.1016/S1386-6532(00)00182-7
- Stewart RJ, Flannery B, Chung JR, Gaglani M, Reis M, Zimmerman RK, Nowalk MP, Jackson L, Jackson ML, Monto AS, Martin ET, Belongia EA, McLean HQ, Fry AM, Havers FP. 2018. Influenza Antiviral Prescribing for Outpatients with an Acute Respiratory Illness and at High Risk for Influenza-Associated Complications during 5 Influenza Seasons-United States, 2011-2016. *Clin Infect Dis*. doi:10.1093/cid/cix922
- Tokars JI, Olsen SJ, Reed C. 2018a. Seasonal Incidence of Symptomatic Influenza in the United States. *Clin Infect Dis*. doi:10.1093/cid/cix1060
- Tokars JI, Olsen SJ, Reed C. 2018b. Seasonal Incidence of Symptomatic Influenza in the United States. *Clin Infect Dis* **66**:1511–1518. doi:10.1093/cid/cix1060
- Vynnycky E, White R. 2010. Introduction. The basics: infections, transmission and models. *An Introduction to Infectious Disease Modelling*.
- Xu X, Blanton L, Elal AIA, Alabi N, Barnes J, Biggerstaff M, Brammer L, Budd AP, Burns E, Cummings CN, Garg S, Kondor R, Gubareva L, Kniss K, Nyanseor S, O'halloran A, Rolfes M, Sessions W, Dugan VG, Fry AM, Wentworth DE, Stevens J, Jernigan D.

2019. Update: Influenza activity in the United States during the 2018–19 season and composition of the 2019–20 influenza vaccine. *Morb Mortal Wkly Rep*.  
doi:10.15585/mmwr.mm6824a3

Yamin D, Gavius A, Solnik E, Davidovitch N, Balicer RD, Galvani AP, Pliskin JS. 2014. An Innovative Influenza Vaccination Policy: Targeting Last Season’s Patients. *PLoS Comput Biol*. doi:10.1371/journal.pcbi.1003643

Yamin D, Jones FK, DeVincenzo JP, Gertler S, Kobiler O, Townsend JP, Galvani AP. 2016. Vaccination strategies against respiratory syncytial virus. *Proc Natl Acad Sci U S A*. doi:10.1073/pnas.1522597113

## Supplementary material for: Optimizing antiviral treatment for seasonal influenza in the United States

Matan Yechezkel, MSc<sup>1\*</sup>, Martial L Ndeffo Mbah, Ph.D.<sup>2,3\*</sup>, Dan Yamin, Ph.D.<sup>1\*</sup>

<sup>1</sup>Department of Industrial Engineering, Tel Aviv University, 55 Haim Levanon St, Tel Aviv, Israel

<sup>2</sup>College of Veterinary Medicine & Biomedical Sciences and <sup>3</sup>School of Public Health, Texas A&M University, College Station, Texas, 77843

\*Authors equally contributed to the manuscript

### Contents

|    |                               |    |
|----|-------------------------------|----|
| 1. | Model .....                   | 23 |
| 2. | Data set and parameters ..... | 26 |
| 3. | Model simulations.....        | 37 |
| 4. | Additional results .....      | 39 |
| 5. | References.....               | 43 |

## 1. Model

### 1.1. The model

We developed a dynamic model for age-stratified Influenza infection progression and transmission in four states in the United States. Our model is a modified Susceptible-Exposed-Infected-Recovered (SEIR) compartmental framework (Vynnycky and White, 2010), whereby the population is stratified into health-related compartments, and transitions between the compartments occurs over time (Main text, Figure 1). To model age-dependent transmission, we stratified the population into  $n = 5$  age groups: 0–4 years, 5–19 years, 20–49 years, 50–64 years, and  $\geq 65$  years. Consistent with immunological observations (“Antibodies Cross-Reactive to Influenza A (H3N2) Variant Virus and Impact of 2010–11 Seasonal Influenza Vaccine on Cross-Reactive Antibodies — United States,” n.d.; Branch et al., 2012; Hancock et al., 2009; Mandelboim et al., 2014; Ranjeva et al., 2019; Sharabi et al., 2016), we assumed age-dependent susceptible reduction due to preexisting serum influenza neutralizing antibodies from previous exposure which reduce susceptibility to infection. Consistent with previous models (Medlock and Galvani, 2009; Ndeffo Mbah et al., 2013; Yamin et al., 2014), we assumed that upon recovery individuals are fully protected for the entire season. This assumption is also supported by prospective studies demonstrating that reinfection in the same season is rare, yet possible (Möst et al., 2019; Möst and Weiss, 2016).

Accordingly, we stratified the population into four health-related compartments: susceptible  $S_{j,k}(t)$ , symptomatic infectious  $I_{j,k}(t)$ , asymptomatic infectious  $A_{j,k}(t)$ , and recovered  $R_{j,k}(t)$ , such that at any given time  $t$  (in days):

$$\sum_{j=1}^n \sum_k [S_{j,k}(t) + I_{j,k}(t) + A_{j,k}(t) + R_{j,k}(t)] = \sum_{j=1}^n \sum_k N_{j,k} = 1. \quad (1)$$

where the index  $j \in \{1, 2, \dots, n\}$  represents the age-group of each individual, and the index  $k \in \{L, H\}$  specifies the risk-group of each individual (i.e. High-risk, or low-risk).

## 1.2. Model transitioning

Before the beginning of each influenza season, individuals start from susceptible compartment  $S_{j,k}(0)$ . Individuals who are immune, due to preexisting serum influenza neutralizing antibodies from previous exposure (proportion of  $\xi_j$  of each age-group), are not included in the susceptible compartment. Thus, they are transitioned to the recovered compartment  $R_{j,k}(0)$  according to their age-group and risk-group. Susceptible individuals can get vaccinated with vaccination coverage  $v_{j,k}$  with the efficacy of the vaccine  $\eta$ . Individuals who are effectively vaccinated transitioned to the  $R_{j,k}(0)$  compartment, where they are fully protected for the entire season. Susceptible individuals can become infected with a force of infection  $\lambda_j(t)$ , depending on their age group  $j$ . Infectious individuals can be asymptomatic with the probability of  $f$  and symptomatic with probability of  $(1 - f)$ . Infected individuals remain in the infectious compartments  $I_{j,k}(t), A_{j,k}(t)$  for  $\varphi$  days and can infect their contacts based on their daily viral load and daily contact behavior (SI Appendix 2.1 Data set and parameters). After infectious period, individuals' transition into the recovered compartment  $R_{j,k}(t)$ , and remain recovered until the end of the season. In the case of asymptomatic infection or treated high-risk, contact mixing is unaffected, but transmission is lower than during symptomatic infection due to a lower viral load (SI Appendix, 2.1 Data set and parameters).

To incorporate the evolution of infectiousness during infection, we explicitly track the number of symptomatic and asymptomatic infected individuals  $(i_{j,k}^\tau, a_{j,k}^\tau)$ , respectively, with regard to their day of infection,  $\tau$ . Hence,  $I_{j,k} = \sum_{\tau=0}^{\varphi} i_{j,k}^\tau$  and  $A_{j,k} = \sum_{\tau=0}^{\varphi} a_{j,k}^\tau$ . Thus, the transmission model is composed of the following system of difference equations:

$$\begin{aligned} S_{j,k}(t) &= S_{j,k}(t-1) - \lambda_j(t) \cdot S_{j,k}(t-1), \\ R_{j,k}(t) &= R_{j,k}(t-1) + i_{j,k}^{\tau=\varphi}(t-1) + a_{j,k}^{\tau=\varphi}(t-1). \end{aligned} \tag{2}$$

with daily numbers of infected individuals:

$$\begin{aligned} i_{j,k}^{\tau=0}(t) &= (1-f) \cdot \lambda_j(t) \cdot S_{j,k}(t-1), \\ i_{j,k}^{\tau \neq 0}(t) &= i_{j,k}^{\tau-1}(t-1). \end{aligned}$$



$$a_{j,k}^{\tau=0}(t) = f \cdot \lambda_j(t) \cdot S_{j,k}(t-1),$$

$$a_{j,k}^{\tau \neq 0}(t) = a_{j,k}^{\tau-1}(t-1).$$

With initial conditions:

$$S_{(j,k)}(0) = (1 - \xi_j) \cdot (1 - \eta v_{j,k}) N_{j,k},$$

$$R_{j,k}(0) = \xi_j \cdot N_{j,k} + (1 - \xi_j) \cdot \eta v_{j,k} \cdot N_{j,k},$$

$$i_{j,k}^{\tau}(0) = a_{j,k}^{\tau}(0) = 0.$$

### 1.3. Force of infection

The rate at which individuals transmit Influenza at time  $t$  is  $\lambda_j(t)$ . This rate depends on the combination of 1) age-specific contact rates between an infected individual and his or her contacts, 2) infectiousness of the infected individual based on his or her daily viral loads, and 3) age-specific susceptibility to infection. In the US, influenza incidence is seasonal, with a peak typically striking in the winter, yet the driver for this seasonality remains uncertain (Lipsitch and Viboud, 2009). Thus, we included general seasonal variation in the susceptibility rate of the model as

$$T(t) = 1 + \cos\left(\frac{2\pi(t - \phi)}{365}\right). \quad (3)$$

The seasonal offset  $\phi$  will be calibrated, for each season separately, in order to fit the influenza case data. We set the boundaries of the search between the fourth week and the twenty-seventh week of the season (according to the data). This formulation was previously shown to accurately capture the seasonal variation in the incidence of respiratory diseases by US state (Pitzer et al., 2015; Yamin et al., 2016).

We incorporate age-specific contact patterns between individuals, represented by contact rate between an infected individual in age-group  $e$  and each of their contacts with susceptible in age-group  $j$ , denote by  $C_{e,j}$ . i.e. the contact matrix  $C$  will be detailed in the next section.

For high-risk individuals from age-group  $j$ , we parameterize the timing of the antiviral treatment uptake (see SI Appendix 2.1 Data set and parameters). For each day during the

exposed and infection periods ( $\tau$ ), we incorporate the proportion of untreated high-risk individuals  $P_{j,\mathcal{T}=0}^\tau$ , the proportion of high-risk individuals who got treated on the second day since symptoms onset  $P_{j,\mathcal{T}=2}^\tau$ , and the proportion of high-risk individuals who got treated on the third day since symptoms onset  $P_{j,\mathcal{T}=3}^\tau$ . high-risk individuals who got treated after the third day since symptoms onset are considered as treated ineffectively, with treatment having no impact on disease progression and severity (Aoki et al., 2003; Heinonen et al., 2010; “Use of Antivirals | CDC,” n.d.). Therefore, we include them in  $P_{j,\mathcal{T}=0}^\tau$ .

Given a contact with an infected host, the logarithm of the infectious viral load has been shown to be correlated with the transmissibility of several respiratory viruses (Couch et al., 1969; Tellier, 2009). The logarithm of the viral load depends on the risk-group of the infected individual  $k \in \{H, L\}$ , the timing of the antiviral treatment for the high-risk individuals  $\mathcal{T}$ , the day of infection  $\tau$  which includes the exposed and infection periods, and on the type of infection. (see SI Appendix 2.1 Data set and parameters). In addition, we consider the age-specific susceptibility rate of and individual  $\beta_j$ , was parametrized by calibrating our model with weekly influenza records (See Section 2.2. calibrated parameters). Taken together, the force of infection  $\lambda_j(t)$  is given by:

$$\begin{aligned}
 \lambda_j(t) &= \beta_j \cdot T(t) \\
 &\cdot \left( \sum_{e=1}^5 C_{e,j} \left( \sum_{\tau=0}^{\varphi} \sum_{\mathcal{T} \in \{0,2,3\}} \log(VL(H, \tau, \mathcal{T}, symptomatic)) \right) \cdot P_{e,\mathcal{T}}^\tau \right. \\
 &\cdot i_{e,H}^\tau(t-1) \\
 &+ \sum_{\tau=0}^{\varphi} \log(VL(L, \tau, \mathcal{T} = 0, symptomatic)) \cdot i_{e,L}^\tau(t-1) \\
 &+ \sum_{k \in \{H,L\}} \sum_{\tau=0}^{\varphi} \log(VL(k, \tau, \mathcal{T} = 0, asymptomatic)) \\
 &\cdot a_{e,k}^\tau(t-1).
 \end{aligned} \tag{4}$$

## 2. Data set and parameters

### 2.1. Fixed parameters

#### *Contact mixing*

We parameterized the age-specific contact rates between an infected individual  $e$  and their contact  $j$ ,  $C_{e,j}$  based on the contact matrix parameterized by a previous study (Yamin et al., 2016). We adjusted the contact mixing matrix to our model age-groups. For age-groups, 5 – 19y, 20 – 49y we analyzed the data used to build the contact matrix using the same methods described in that study. This contact data exhibits frequent mixing between similar age-groups, moderate mixing between children and adults in their thirties (likely their parents), and infrequent mixing between other groups.

**Table S1.** Age-specific rates  $C_{e,j}$  between an infected individual  $e$  and their contact  $j$ .

|             |           |            |             |             |            |
|-------------|-----------|------------|-------------|-------------|------------|
| 0-4 years   | 43        | 18         | 11          | 6           | 3.8        |
| 5-19 years  | 18        | 37         | 10          | 8.9         | 3.9        |
| 20-49 years | 11        | 10         | 24          | 14          | 6          |
| 50-64 years | 6         | 8.9        | 14          | 18          | 8.1        |
| ≥ 65 years  | 3.8       | 3.9        | 6           | 8.1         | 12         |
|             | 0-4 years | 5-19 years | 20-49 years | 50-64 years | ≥ 65 years |

### *Viral load*

Using recent prospective studies of the course of Influenza infections in young children and adults, we estimated the viral load for asymptomatic, symptomatic high- and low-risk and treated high-risk who got treated on the first three days since symptoms onset (Ip et al., 2017; Lee et al., 2013).

Viral load for asymptomatic estimated using the results of a prospective study that tracked after households in Hong Kong with an influenza confirmed patient (Ip et al., 2017). To estimate the viral load for the asymptomatic infected individuals, we smoothed the data of paucisymptomatic.

For symptomatic high- and low-risk and treated high-risk who got treated on the first three days from symptoms onset, we estimated the viral load using the data of a prospective study monitored patients with laboratory-confirmed influenza who admitted to the medical department of the Prince of Whales Hospital(Lee et al., 2013). Day zero and days eight to fourteen since symptoms was estimated by fitting an exponential curve to the data. To estimate the viral load during the exposure period we scaled the data using the data of asymptomatic. For treated high-risk, the viral load prior to initiating treatment was set to be the same as for not treated high-risk individuals (Figure S1).

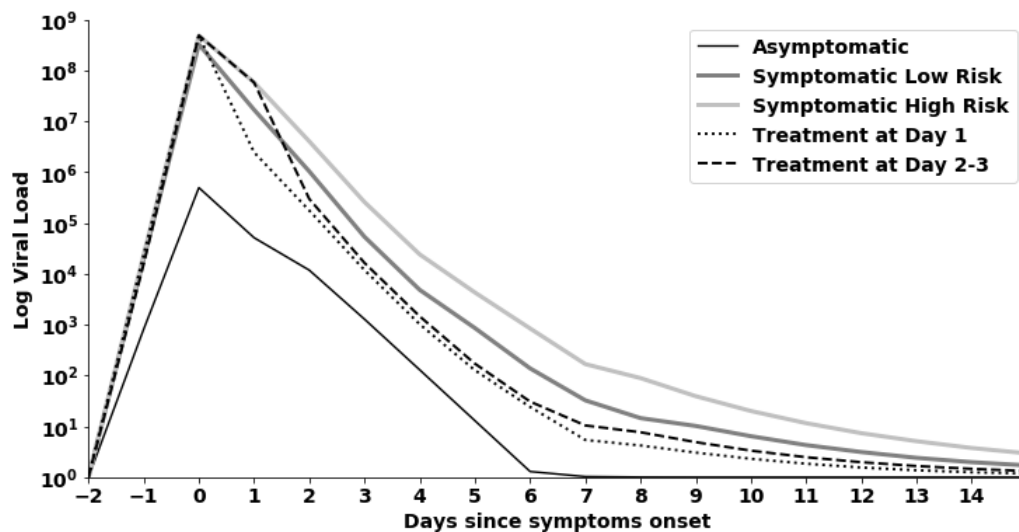

**Figure S1.** Daily log viral load following influenza infection for asymptomatic, symptomatic high and low-risk and treated high risk who got treated on the first three days since symptoms onset.

### *Hospitalizations*

The number of hospitalizations for each age- and risk-group was calculated by multiplying the number of symptomatic infected individuals by the probability of hospitalization given influenza infection (See Table S3). Using data from epidemiological study, we calculated the fraction of symptomatically infected individuals that will be hospitalized based on the ratio between hospitalizations and infection cases stratified by age (Rolfes et al., 2018). For age-groups 5 – 19y, 20 – 49y, 50 – 64y,  $\geq 65y$ , the proportion of hospitalizations related to each risk-group estimated based on the ratio between hospitalizations of high-risk and low-risk as suggested by previous epidemiological study(Mullooly et al., 2007). For age-group 0 – 4y a previous retrospective study suggests that 37% of hospitalizations related to high-risk children

(Ampofo et al., 2006). These data are consistent with the US Influenza hospitalization surveillance network data (Chaves et al., 2015).

Infected high-risk individuals who treated within three days from symptoms onset have a lower probability to be hospitalized (Kaiser et al., 2003; Piedra et al., 2009). For individuals who younger than 19 years old, we reduced the probability of hospitalization given an infection by 75% (Piedra et al., 2009). For adults (older than 19 years old) we reduced the probability by 59% (Kaiser et al., 2003).

### *Vaccinations coverage*

We estimated the vaccination coverage based on data obtained from Center for Disease Control and Prevention (CDC) (“2010-11 through 2018-19 Influenza Seasons Vaccination Coverage Trend Report | FluVaxView | Seasonal Influenza (Flu) | CDC,” n.d.). The data is stratified by state, age, season, and risk-group. To adjust the age stratification in the data to the age-groups used in our model, we assumed uniform distribution for each age-group in the data. For age-groups without risk-group stratification we assumed equal vaccination coverage for both low- and high-risk individuals.

We parametrize the vaccination coverage for each year at both national and state-level as observed from 2013-2018 (See Table S2). For the national coverage we used the median vaccination coverage for each year. As some of the states do not have data for season 2013-14, we used the average coverage of seasons 2012-13, 2014-15 as the coverage for season 2013-14. In both levels, we used the mean coverage over the five seasons as our baseline.

As mentioned in the equation (2), the vaccination coverage  $v_{j,k}$  is multiplied by the vaccination efficacy  $\eta$  to calculate the effective vaccination coverage.

**Table S2.** Average Vaccination coverage (“2010-11 through 2018-19 Influenza Seasons Vaccination Coverage Trend Report | FluVaxView | Seasonal Influenza (Flu) | CDC,” n.d.).

| Age-group          | 0-4 years |        | 5-19 years |        | 20-49 years |        | 50-64 years |        | ≥ 65 years |        |
|--------------------|-----------|--------|------------|--------|-------------|--------|-------------|--------|------------|--------|
| Risk-group         | high      | low    | high       | low    | high        | low    | high        | low    | high       | low    |
| <b>US</b>          | 70.08%    | 70.08% | 55.92%     | 55.92% | 45.90%      | 33.99% | 45.90%      | 33.99% | 64.56%     | 64.56% |
| <b>California</b>  | 71.26%    | 71.26% | 57.44%     | 57.44% | 44.45%      | 32.20% | 44.45%      | 32.20% | 63.14%     | 63.14% |
| <b>Connecticut</b> | 85.60%    | 85.60% | 64.97%     | 64.97% | 52.02%      | 37.62% | 52.02%      | 37.62% | 66.80%     | 66.80% |
| <b>Virginia</b>    | 75.58%    | 75.58% | 59.10%     | 59.10% | 48.54%      | 39.92% | 48.54%      | 39.92% | 67.72%     | 67.72% |
| <b>Texas</b>       | 71.60%    | 71.60% | 57.87%     | 57.87% | 45.38%      | 31.60% | 45.38%      | 31.60% | 63.10%     | 63.10  |

### *Treatment coverage*

Antiviral treatment is only provided to high-risk individuals that seek care in health clinics and hospitals. We assumed that following clinic or hospital visit and treatment prescription, it takes at least one day to a patient to initiate course of treatment. Therefore, the earliest treatment initiation time is two days from symptoms onset. Moreover, people who sought care on the third and fourth day since symptoms onset are considered as treated ineffectively, with treatment having no impact on disease progression and severity (Aoki et al., 2003; Heinonen et al., 2010; “Use of Antivirals | CDC,” n.d.) . Thus, we included them with the untreated individuals.

Hence, the probability of infected high-risk to seek care and get treated effectively (getting treated within 3 days from symptoms onset) is given by equation (5):

$$\begin{aligned} \Pr(\text{getting treatment effectively}) &= \Pr(\text{Seeking care} | \text{infected high} - \\ &\text{risk}) \cdot \Pr(\text{Seeking care} \leq 2 \text{ days from symptoms onset} | \text{Seeking care}) \cdot \\ &\Pr(\text{getting treated} | \text{Seeking care} \leq 2 \text{ days from symptoms onset care}). \end{aligned} \quad (5)$$

The probability of seeking care given a high-risk infection stratified by age was calculated using data from an epidemiological study (Molinari et al., 2007) (See Table S3).

Using data from recent large scale studies on the time to seek for care and antiviral prescription among laboratory-confirmed high-risk influenza patients in the US (Biggerstaff et al., 2014; Stewart et al., 2018), we estimated the probability of seeking care within two days from symptoms onset given an infected high-risk who sought for care and the probability of getting treated given an infected high-risk who sought for care within two days since symptoms onset. Those studies provided age-stratified data on the proportion of treated individuals who sought care during the first two days, 3 to 7 days, and  $\geq 7$  days since symptoms onset.

Further to our assumptions, we assumed high-risk individuals who sought care during the first two days since symptoms onset, have equal probability of treatment initiation time on the second and third day since symptoms onset. High-risk patients treated effectively are accounted for 54.5% of the treated high-risk patients (Biggerstaff et al., 2014).

**Table S3:** Fixed parameters used in the transmission model.

| Parameter | Description                                                                                                                                  | Value                                                         | Justification                                                                                                                                                                                                                                                                                   |
|-----------|----------------------------------------------------------------------------------------------------------------------------------------------|---------------------------------------------------------------|-------------------------------------------------------------------------------------------------------------------------------------------------------------------------------------------------------------------------------------------------------------------------------------------------|
| $\xi_j$   | Proportion of individuals in age-group $j$ who are immune due to preexisting serum influenza neutralizing antibodies from previous exposure. | 0-4: 0<br>5-19: 0.2<br>20-49: 0.3<br>50-64: 0.25<br>65+: 0.25 | (Mandelboim et al., 2014)<br><br>(Branch et al., 2012)<br><br>("Antibodies Cross-Reactive to Influenza A (H3N2) Variant Virus and Impact of 2010–11 Seasonal Influenza Vaccine on Cross-Reactive Antibodies — United States," n.d.)<br><br>(Hancock et al., 2009)<br><br>(Sharabi et al., 2016) |
| $N_{j,k}$ | Population size of risk-group $k$ age-group $j$ .                                                                                            | Varies between states                                         | (Molinari et al., 2007)<br><br>("Population Distribution by Age   The Henry J.                                                                                                                                                                                                                  |

|           |                                                                                                   |                                                                                                                                                                                                                                                         |                                                                                                                       |
|-----------|---------------------------------------------------------------------------------------------------|---------------------------------------------------------------------------------------------------------------------------------------------------------------------------------------------------------------------------------------------------------|-----------------------------------------------------------------------------------------------------------------------|
|           |                                                                                                   |                                                                                                                                                                                                                                                         | Kaiser Family Foundation,” n.d.)                                                                                      |
| $\eta$    | Influenza vaccination efficacy.                                                                   | 0.45                                                                                                                                                                                                                                                    | (“CDC Seasonal Flu Vaccine Effectiveness Studies   CDC,” n.d.)<br>(Doyle et al., 2019)                                |
| $h_{j,k}$ | Probability of hospitalization given an infected individual in age-group $j$ and risk-group $k$ . | <p>k=L</p> <p>0-4: 0.0043</p> <p>5-19:<br/>0.0003</p> <p>20-49:<br/>0.00062</p> <p>50-64:<br/>0.0014</p> <p>65+:<br/>0.0235</p> <p>k=H</p> <p>0-4: 0.0025</p> <p>5-19:<br/>0.0024</p> <p>20-49:<br/>0.005</p> <p>50-64:<br/>0.0095</p> <p>65+: 0.07</p> | <p>(Rolfes et al., 2018)</p> <p>(Mullooly et al., 2007)</p> <p>(Ampofo et al., 2006)</p> <p>(Chaves et al., 2015)</p> |
| $f$       | Probability of becoming asymptomatic given an infection.                                          | 0.191                                                                                                                                                                                                                                                   | (Leung et al., n.d.)                                                                                                  |



|                                                            |                                                                                                                                                                                                                              |                                                                                                                             |                                                                                 |
|------------------------------------------------------------|------------------------------------------------------------------------------------------------------------------------------------------------------------------------------------------------------------------------------|-----------------------------------------------------------------------------------------------------------------------------|---------------------------------------------------------------------------------|
|                                                            |                                                                                                                                                                                                                              |                                                                                                                             | (Furuya-Kanamori et al., 2016)                                                  |
| $\varphi$                                                  | Length of Infection since exposure.                                                                                                                                                                                          | 14 days                                                                                                                     | (Bell et al., 2006)                                                             |
| $P_{j,\mathcal{T}}^{\tau}$                                 | Proportion of treated high-risk in age-group $j$ on day $\tau$ , initiate treatment on day $\mathcal{T} \in \{0,2,3\}$ from symptoms onset. $\mathcal{T} = 0$ means either no treatment provided or treatment ineffectively. | $\tau \geq 2$<br>$\mathcal{T} = 2 \text{ or } 3$<br>0-4: 0.086<br>5-19: 0.054<br>20-49: 0.095<br>50-64: 0.074<br>65+: 0.063 | (Molinari et al., 2007)<br>(Biggerstaff et al., 2014)<br>(Stewart et al., 2018) |
| $C_{e,j}$                                                  | contact rate between an infected individual in age-group $e$ and each of their contacts with susceptible in age-group $j$ .                                                                                                  |                                                                                                                             | (Yamin et al., 2016)                                                            |
| VL (k, $\tau$ , $\mathcal{T}$ , asymptomatic /symptomatic) | Viral load of infected individuals in risk-group $k$ , on day of infection $\tau$ given treatment initiation day and symptomatic or asymptomatic illness.                                                                    |                                                                                                                             | (Ip et al., 2017)<br>(Lee et al., 2013)                                         |

## 2.2. Calibrated parameters

### *Influenza cases data and case definition*

To estimate empirically unknown epidemiological parameters, we calibrated our model to the weekly number of influenza incidence according to the CDC data. We obtained the weekly ILI cases for each state and season. We also obtained the weekly proportion of positive specimen to influenza (confirmed by viral isolation, antigen detection, or PCR). These data were collected by the CDC's National Respiratory and Enteric Virus Surveillance System and state health departments during 2014 to 2019 ("FluView Interactive | CDC," n.d.). To account for

the influenza cases, we multiply the weekly ILI cases by the proportion of positive specimens to influenza. Moreover, to derive the weekly cases for each age-group, we assumed that the proportion of weekly cases for each age-group is the same as the state's population age structure. The age-group distribution for each state was obtained from the Henry J. Kaiser Foundation's database ("Population Distribution by Age | The Henry J. Kaiser Family Foundation," n.d.).

To account for unreported cases, the influenza weekly cases data described above was adjusted to fit the median attack rate of the age-group according to Yamin et. al (Yamin et al., 2016). We used data from a recent meta-analysis study, of seasonal influenza in the US between 2011-2016, to obtain the median annual attack rate per age-group (Tokars et al., 2018). To derive the influenza weekly incidence, we divided the weekly influenza cases by the mean of the seasonal cases such that the yearly average attack rate is equal to the median attack rate.

### *Calibration*

To calibrate the model to the incidence data we minimized the squared error between model predictions and incidence data. This is equivalent to maximum likelihood estimation assuming a normal distribution of the error. We conducted this calibration for each of the five seasons (2014-2019) separately. For the calibration, we assumed the median US vaccination coverage by age to account for the variation in attack rates due to vaccination uptake. Also, we assumed the same susceptibility rate for both low- and high-risk in each age-group.

The final transmission model (Main text Figure 1A) included five parameters to be estimated through model calibration: seasonal offset  $\phi$ ; seasonal susceptibility rate  $\beta_j$  for age-group  $j$ : 0-4y, 5-49y, 50-64y, 65y.

**Table S4.** Calibrated parameters.

| State       | Season  | Seasonal offset $\phi$ | Susceptibility among age-group 0-4y $\beta_{0-4}$ | Susceptibility among age-group 5-49y $\beta_{5-49}$ | Susceptibility among age-group 50-64y $\beta_{50-64}$ | Susceptibility among age-group 65+y $\beta_{65+}$ |
|-------------|---------|------------------------|---------------------------------------------------|-----------------------------------------------------|-------------------------------------------------------|---------------------------------------------------|
| California  | 2014-15 | 68.724                 | 0.0032                                            | 0.0015                                              | 0.0031                                                | 0.0021                                            |
|             | 2015-16 | 90.950                 | 0.0031                                            | 0.0015                                              | 0.0030                                                | 0.0021                                            |
|             | 2016-17 | 67.791                 | 0.0028                                            | 0.0014                                              | 0.0028                                                | 0.0020                                            |
|             | 2017-18 | 47.705                 | 0.0031                                            | 0.0015                                              | 0.0030                                                | 0.0021                                            |
|             | 2018-19 | 92.125                 | 0.0028                                            | 0.0015                                              | 0.0029                                                | 0.0021                                            |
| Texas       | 2014-15 | 44.683                 | 0.0026                                            | 0.0015                                              | 0.0029                                                | 0.0021                                            |
|             | 2015-16 | 97.567                 | 0.0026                                            | 0.0015                                              | 0.0028                                                | 0.0022                                            |
|             | 2016-17 | 87.091                 | 0.0028                                            | 0.0015                                              | 0.0029                                                | 0.0021                                            |
|             | 2017-18 | 73.079                 | 0.0029                                            | 0.0016                                              | 0.0032                                                | 0.0022                                            |
|             | 2018-19 | 88.573                 | 0.0028                                            | 0.0015                                              | 0.0031                                                | 0.0022                                            |
| Connecticut | 2014-15 | 82.268                 | 0.0031                                            | 0.0015                                              | 0.0029                                                | 0.0020                                            |
|             | 2015-16 | 100.729                | 0.0032                                            | 0.0016                                              | 0.0029                                                | 0.0021                                            |
|             | 2016-17 | 85.539                 | 0.0032                                            | 0.0015                                              | 0.0029                                                | 0.0020                                            |
|             | 2017-18 | 85.853                 | 0.0036                                            | 0.0016                                              | 0.0031                                                | 0.0020                                            |
|             | 2018-19 | 80.849                 | 0.0032                                            | 0.0016                                              | 0.0030                                                | 0.0020                                            |
| Virginia    | 2014-15 | 44.862                 | 0.0032                                            | 0.0015                                              | 0.0029                                                | 0.0020                                            |
|             | 2015-16 | 107.501                | 0.0031                                            | 0.0016                                              | 0.0030                                                | 0.0022                                            |
|             | 2016-17 | 95.983                 | 0.0032                                            | 0.0016                                              | 0.0031                                                | 0.0021                                            |
|             | 2017-18 | 84.540                 | 0.0035                                            | 0.0016                                              | 0.0032                                                | 0.0020                                            |
|             | 2018-19 | 96.904                 | 0.0032                                            | 0.0016                                              | 0.0031                                                | 0.0021                                            |

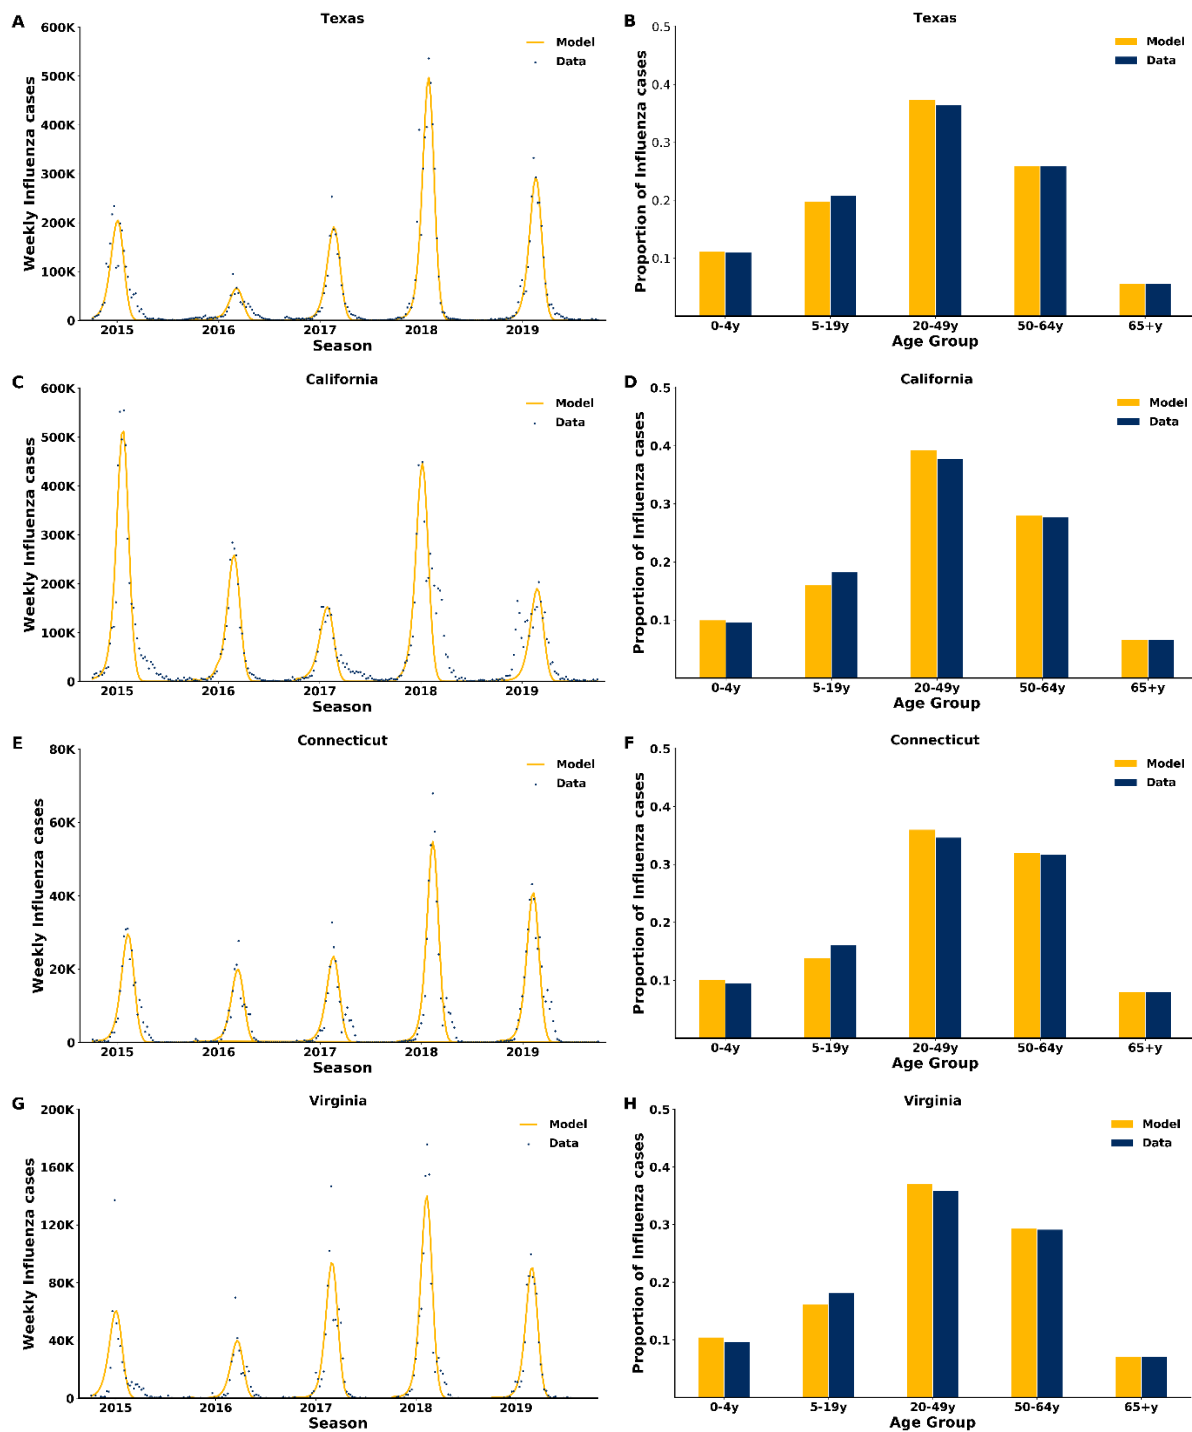

**Figure S2. Model fit.** Time series of recorded weekly influenza cases and model fit to Texas, California, Connecticut and Virginia (A, C, E & G). Data and model fit to the age distribution among influenza infections (B, D, F & H).

### 3. Model simulations

#### *Main text Figure 2*

To evaluate the number of cases and hospitalizations averted by early treatment (within 48 hours since symptoms onset. For conservative purposes, we assumed treating on the second day) of infected high-risk individuals who are currently receiving treatment on the third and more than three days after symptoms onset (Main Text, Figure 2), we ran the model for each of the five seasons with an increased proportion of the infected high-risk treated on the second day since symptoms onset. For each season, we ran the model using the average state's vaccination coverage. The addition to the proportion of the infected high-risk treated on the second day was done by shifting first the individuals who treated ineffectively (more than 72 hours since symptoms onset), followed by the individuals who treated on the third day.

The number of additional cases and hospitalizations averted was computed as the average over the model projections of 5 seasons compared to the baseline case. For the range, we did the same analysis described above but we used the vaccination coverage of the season with the highest (lower bound) and the lowest (higher bound) vaccination coverage in the seasons between (2013 - 2018) for each state.

#### *Main text Figure 3*

We estimated the number of additional cases and hospitalizations averted due to increasing the treatment coverage of high-risk patients assuming that all receive treatment within 48 hours from symptoms onset. To assess the benefit in terms of cases and hospitalizations averted we ran the model with treatment coverage varying from 10%-30% for each season and state using the state's average vaccination coverage. We also assumed that there are no infected high-risk individuals who getting treatment three days since symptoms onset. For each fixed portion we compared the mean model projections to the baseline scenario.

We also conducted a sensitivity analysis to examine the robustness of our results. In this analysis, we examined the effect of the vaccination coverage on the number of additional cases and hospitalizations averted by changing vaccination coverage for both model's projections of the new treatment policy and the baseline treatment scenario. We increased and decrease the state's mean vaccination coverage by 10%, 20%.

#### *Main text Figure 4*

To estimate cases and hospitalizations averted per treatment for each age group we analyzed the scenario in which all the infected high-risk individuals in the examined age-group are seeking care and getting treatment within 48 hours since symptoms onset. For the rest of the age-groups we change the timeliness of initiating treatment to 48 hours since symptoms onset without changing the baseline treatment coverage. The number of additional cases and hospitalizations averted per treatment was computed by comparing the model's projections of the new scenario with the baseline scenario, while considering the increase in the number of treated high-risk patients.

#### *Main text Figure 5*

We conducted a two-way sensitivity analysis to investigate the joint impact of seasonal attack rate and vaccination coverage in each state on the number of cases averted per treatment. We ran the model with varying proportion of infected high-risk who seeks care and gets treated within 48 hours from symptoms onset from 10%-30% while increasing and decreasing the state's average vaccination coverage by 10%-40%. We conducted the analysis for median, high, and low seasonal attack rate for each state. The high and low attack rate were informed by the year with the lowest and the year with the highest attack rate for each state between 2013-2018.

## 4. Additional results

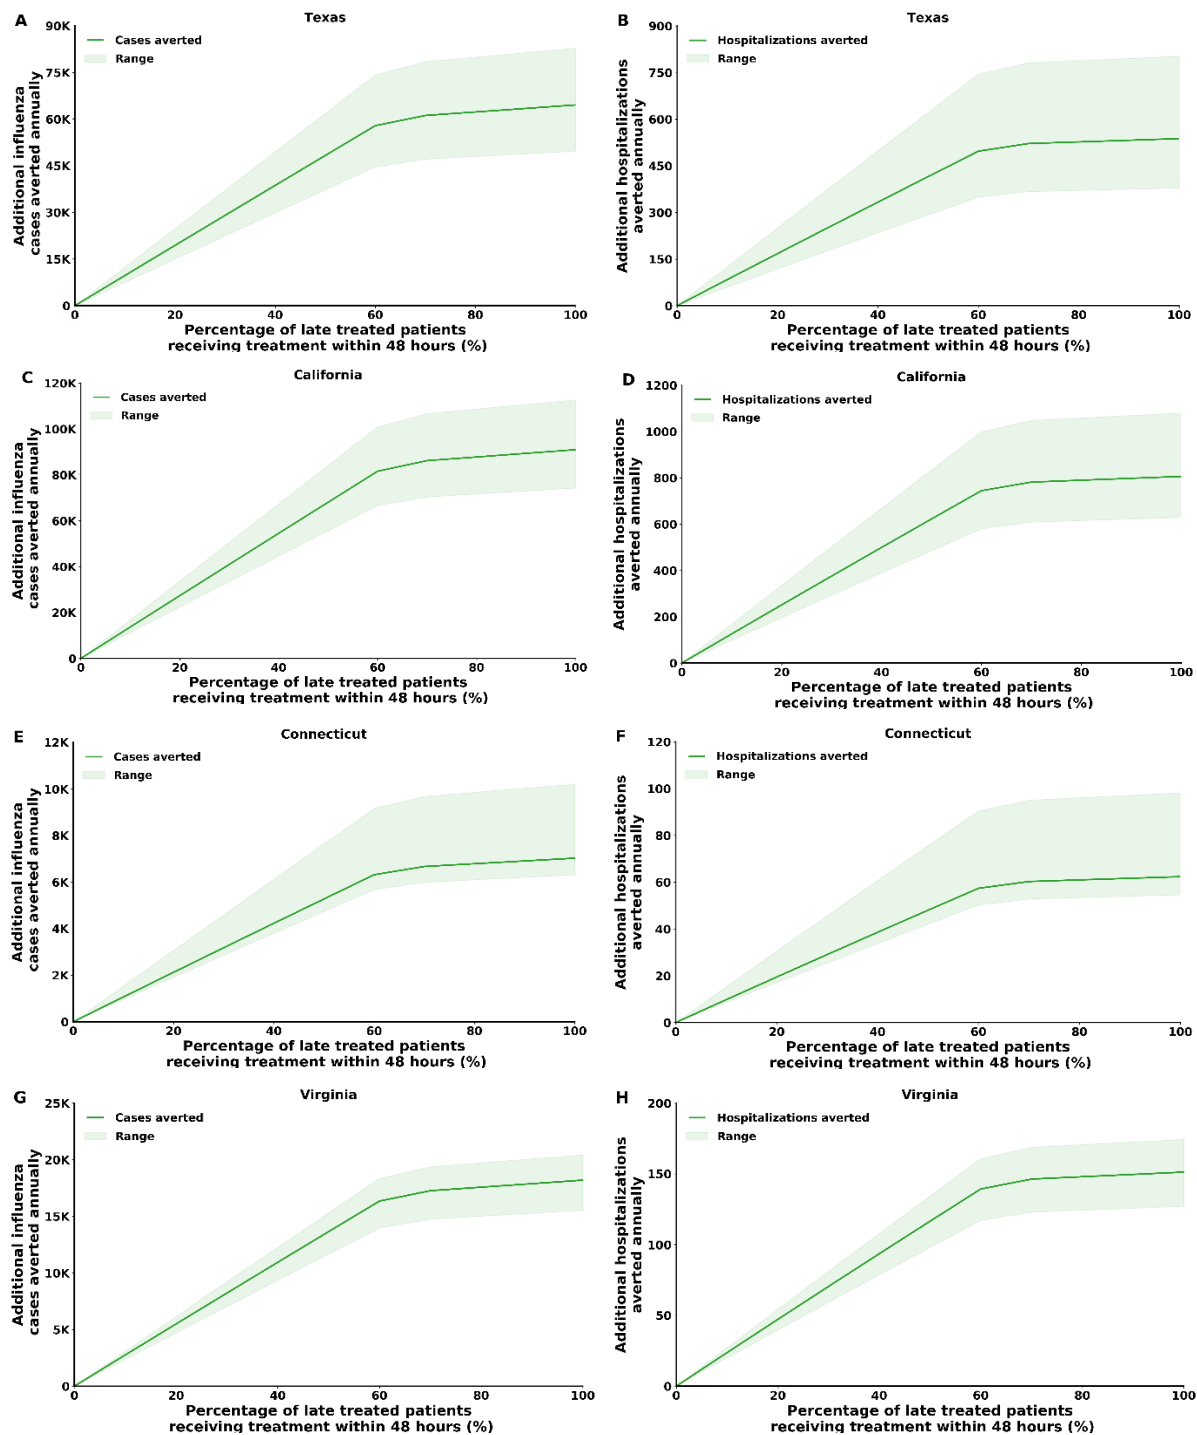

**Figure S3.** Model projection of in influenza cases and hospitalizations averted in Texas, California, Connecticut, and Virginia if treating within 48 hours from symptoms onset, 0-100% of the high-risk individuals who were treated after 48 hours. (A, C, E & G) Total number of cases averted. (B, D, F & H) Total number of hospitalizations averted.

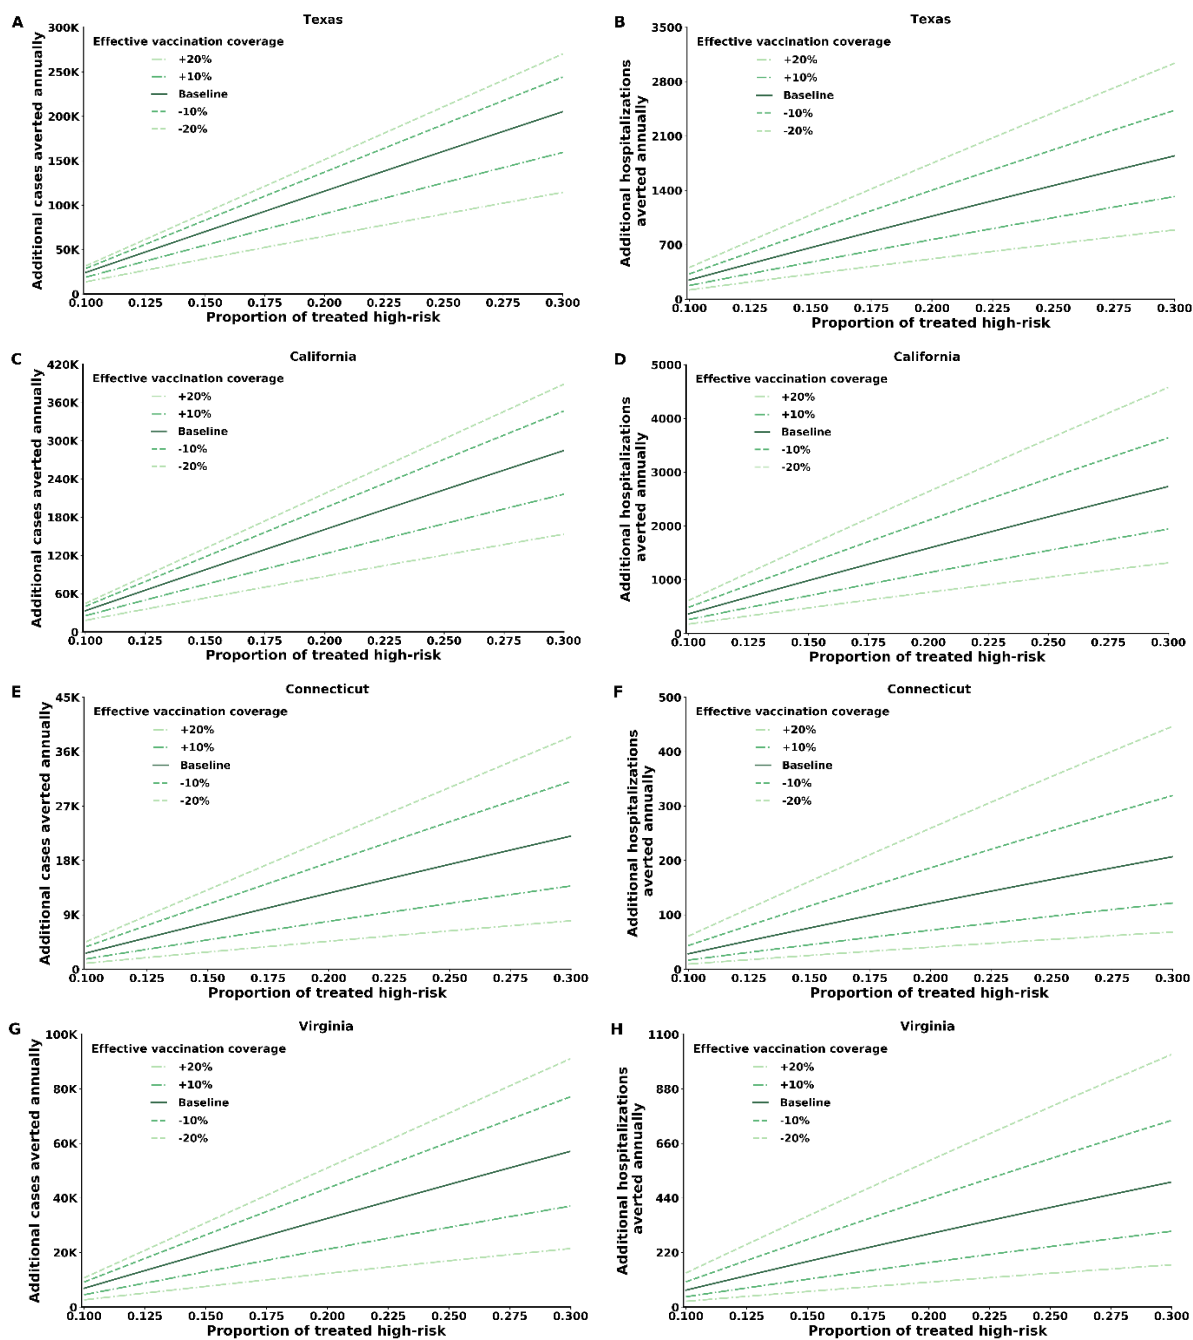

**Figure S4.** Model projections of influenza cases and hospitalizations averted in Texas, California, Connecticut, and Virginia by increasing the portion of treated high-risk individuals who seek care and get treated within 48 hours from symptoms onset. (A, C, E & G) Total number of cases averted. (B, D, F & H) Total number of hospitalizations averted.



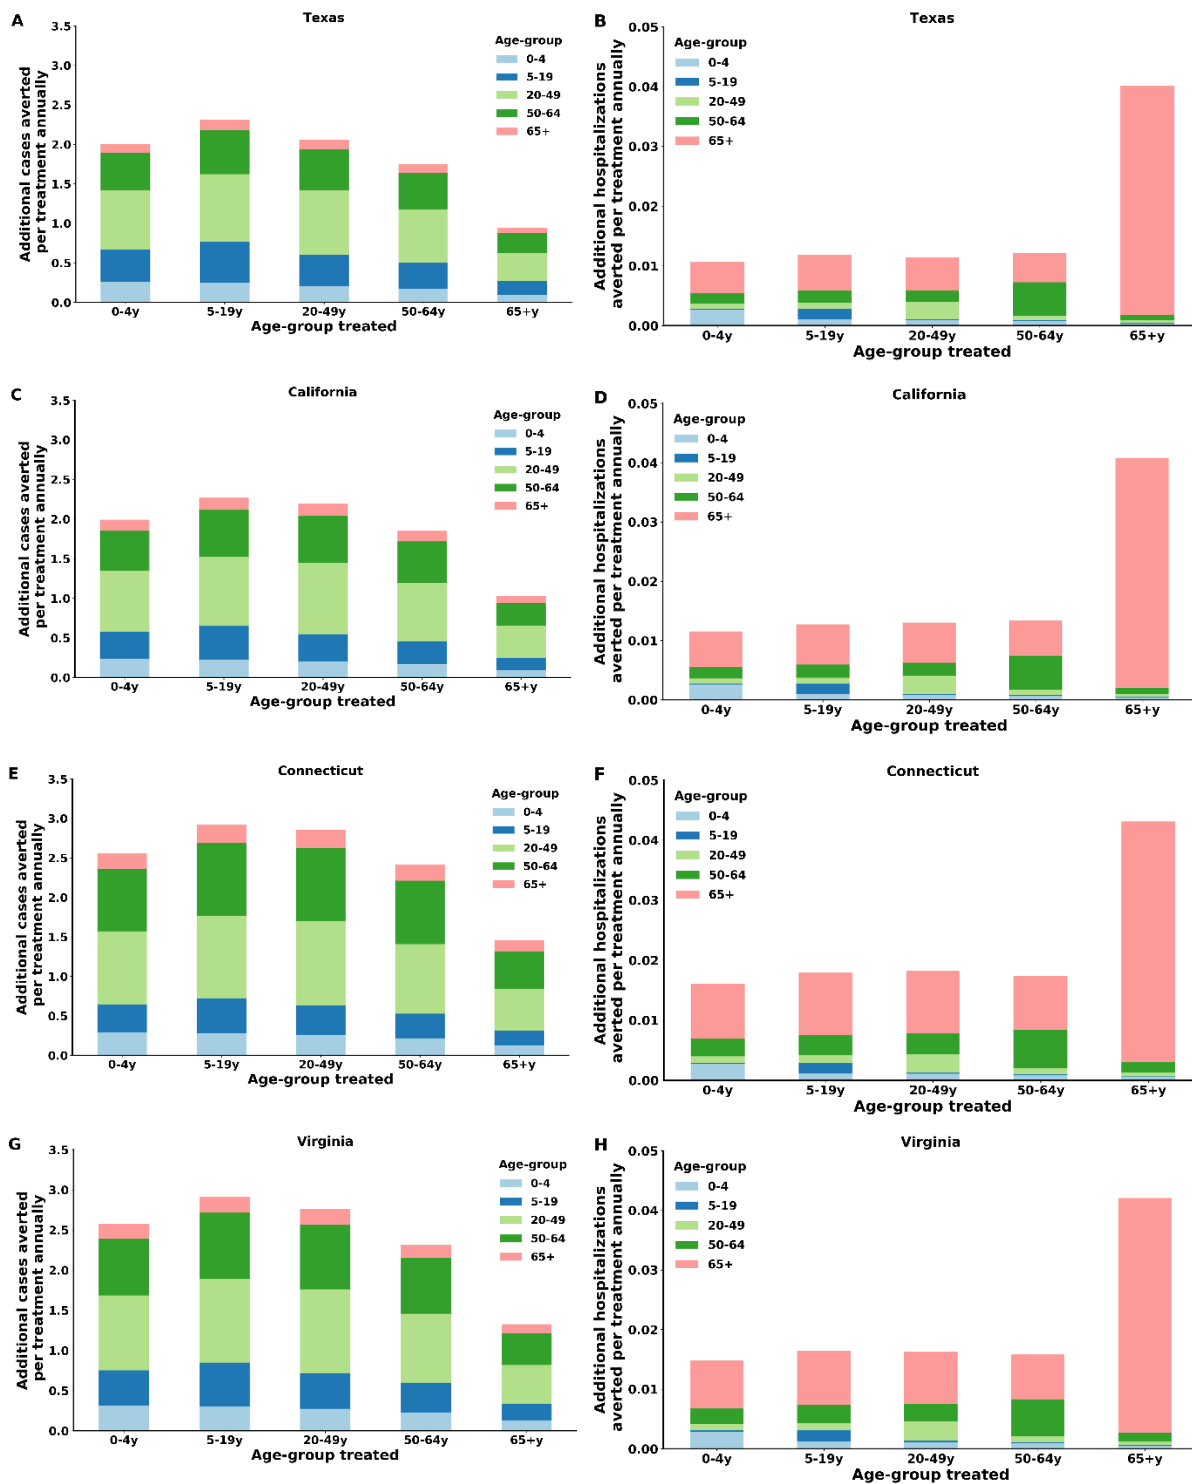

**Figure S5.** Model projections of influenza cases and hospitalizations averted per treatment, by treating each age-group 48 hours since symptoms onset in Texas, California, Connecticut and Virginia. (A, C, E & G) Number of cases averted per treatment for each age-group stratified by age-group. (B, D, F & H) Number of hospitalizations averted per treatment for each age-group stratified by age-group.

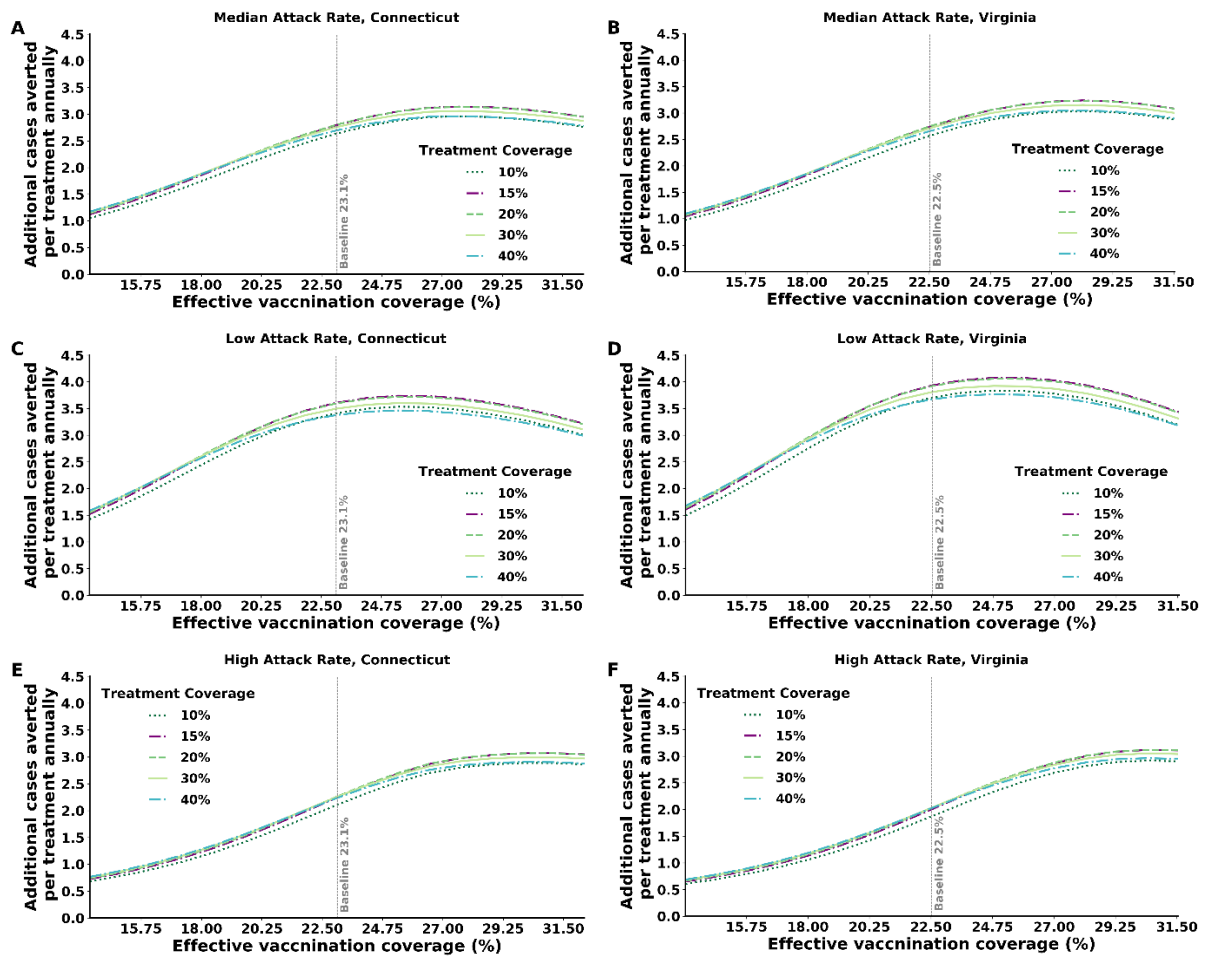

**Figure S6.** The mutual effect of attack rate and vaccination coverage, in Connecticut and Virginia, on the number of cases averted per treatment for each treatment coverage among high-risk individuals infected with influenza. Infected high-risk individuals seek care and get treatment within 48 hours from symptoms onset. (A, B) Median attack rate settings. (C, D) Low attack rate settings. (E, F) High attack rate settings.

## 5. References

- 2010-11 through 2018-19 Influenza Seasons Vaccination Coverage Trend Report | FluVaxView | Seasonal Influenza (Flu) | CDC. n.d.  
<https://www.cdc.gov/flu/fluvoxview/reportshtml/trends/index.html>
- Ampofo K, Gesteland PH, Bender J, Mills M, Daly J, Samore M, Byington C, Pavia AT, Srivastava R. 2006. Epidemiology, complications, and cost of hospitalization in children with laboratory-confirmed influenza infection. *Pediatrics* **118**:2409–2417. doi:10.1542/peds.2006-1475
- Antibodies Cross-Reactive to Influenza A (H3N2) Variant Virus and Impact of 2010–11 Seasonal Influenza Vaccine on Cross-Reactive Antibodies — United States. n.d.  
<https://www.cdc.gov/mmwr/preview/mmwrhtml/mm6114a1.htm>
- Aoki FY, Macleod MD, Paggiaro P, Carewicz O, El Sawy A, Wat C, Griffiths M, Waalberg E, Ward P, Harding Rains C, Kirkwood P, Drabble K, Merritt D, Bourdeau L, Ginn D, Rajan S, Pawsey S, Gilbride J, Kinnersley N, Mills T, Mahoney P, Hoof T. 2003. Early administration of oral oseltamivir increases the benefits of influenza treatment. *J Antimicrob Chemother* **51**:123–129. doi:10.1093/jac/dkg007
- Bell D, Nicoll A, Fukuda K, Horby P, Monto A, Hayden F, Wylks C, Sanders L, Van Tam J. 2006. Nonpharmaceutical interventions for pandemic influenza, international measures. *Emerg Infect Dis*. doi:10.3201/eid1201.051370
- Biggerstaff M, Jhung MA, Reed C, Fry AM, Balluz L, Finelli L. 2014. Influenza-like illness, the time to seek healthcare, and influenza antiviral receipt during the 2010-2011 influenza season - United States. *J Infect Dis*. doi:10.1093/infdis/jiu224
- Branch A, Veguilla V, Gillis E, Reed C, Noland H, Thomas L, Browning P, Balish A, Fry A, Cox N, Katz JM, Hancock K. 2012. Antibodies cross-reactive to influenza a (H3N2) variant virus and impact of 2010-11 seasonal influenza vaccine on cross-reactive antibodies - United States. *Morb Mortal Wkly Rep*.
- CDC Seasonal Flu Vaccine Effectiveness Studies | CDC. n.d. <https://www.cdc.gov/flu/vaccines-work/effectiveness-studies.htm>
- Chaves SS, Lynfield R, Lindegren M Lou, Bresee J, Finelli L. 2015. The US Influenza Hospitalization Surveillance Network **21**. doi:10.3201/eid2109.141912
- Couch RB, Knight V, Douglas RG, Black SH, HAMORY BH. 1969. The minimal infectious dose of adenovirus type 4; the case for natural transmission by viral aerosol. *Trans Am Clin Climatol Assoc*.
- Doyle JD, Chung JR, Kim SS, Gaglani M, Raiyani C, Zimmerman RK, Nowalk MP, Jackson ML, Jackson LA, Monto AS, Martin ET, Belongia EA, McLean HQ, Foust A, Sessions W, Berman

- LS, Garten RJ, Barnes JR, Wentworth DE, Fry AM, Patel MM, Flannery B. 2019. Interim Estimates of 2018-19 Seasonal Influenza Vaccine Effectiveness - United States, February 2019. *MMWR Morb Mortal Wkly Rep*. doi:10.15585/mmwr.mm6806a2
- FluView Interactive | CDC. n.d. <https://www.cdc.gov/flu/weekly/fluviewinteractive.htm>
- Furuya-Kanamori L, Cox M, Milinovich GJ, Soares Magalhaes RJ, Mackay IM, Yakob L. 2016. Heterogeneous and dynamic prevalence of asymptomatic influenza virus infections. *Emerg Infect Dis* **22**:1052–1056. doi:10.3201/eid2206.151080
- Hancock K, Veguilla V, Lu X, Zhong W, Butler EN, Sun H, Liu F, Dong L, DeVos JR, Gargiullo PM, Brammer TL, Cox NJ, Tumpey TM, Katz JM. 2009. Cross-Reactive Antibody Responses to the 2009 Pandemic H1N1 Influenza Virus. *N Engl J Med* **361**:1945–1952. doi:10.1056/NEJMoa0906453
- Heinonen S, Silvennoinen H, Lehtinen P, Vainionpää R, Vahlberg T, Ziegler T, Ikonen N, Puhakka T, Heikkinen T. 2010. Early Oseltamivir Treatment of Influenza in Children 1–3 Years of Age: A Randomized Controlled Trial. *Clin Infect Dis* **51**:887–894. doi:10.1086/656408
- Ip DKM, Lau LLH, Leung NHL, Fang VJ, Chan KH, Chu DKW, Leung GM, Peiris JSM, Uyeki TM, Cowling BJ. 2017. Viral Shedding and Transmission Potential of Asymptomatic and Paucisymptomatic Influenza Virus Infections in the Community. *Clin Infect Dis*. doi:10.1093/cid/ciw841
- Kaiser L, Wat C, Mills T, Mahoney P, Ward P, Hayden F. 2003. Impact of oseltamivir treatment on influenza-related lower respiratory tract complications and hospitalizations. *Arch Intern Med*. doi:10.1001/archinte.163.14.1667
- Lee N, Chan PK, Rainer TH, Hui D, Choi KW, Cockram CS. 2013. Influenza virus load in hospitalised patients. *Hong Kong Med J*.
- Leung NHL, Xu C, Ip DKM, Cowling BJ. n.d. The fraction of influenza virus infections that are asymptomatic: a systematic review and meta-analysis. doi:10.1097/EDE.0000000000000340
- Lipsitch M, Viboud C. 2009. Influenza seasonality: Lifting the fog. *Proc Natl Acad Sci U S A*. doi:10.1073/pnas.0900933106
- Mandelboim M, Bromberg M, Sherbany H, Zucker I, Yaary K, Bassal R, Dichtiar R, Cohen D, Shohat T, Mendelson E, Green MS. 2014. Significant cross reactive antibodies to influenza virus in adults and children during a period of marked antigenic drift. doi:10.1186/1471-2334-14-346
- Medlock J, Galvani AP. 2009. Optimizing influenza vaccine distribution. *Science (80- )*. doi:10.1126/science.1175570
- Molinari NAM, Ortega-Sanchez IR, Messonnier ML, Thompson WW, Wortley PM, Weintraub E,

- Bridges CB. 2007. The annual impact of seasonal influenza in the US: Measuring disease burden and costs. *Vaccine*. doi:10.1016/j.vaccine.2007.03.046
- Möst J, Redlberger-Fritz M, Weiss G. 2019. Multiple Influenza Virus Infections in 4 Consecutive Epidemiological Seasons: A Retrospective Study in Children and Adolescents. *Open Forum Infect Dis*. doi:10.1093/ofid/ofz195
- Möst J, Weiss G. 2016. Consecutive Infections with Influenza A and B Virus in Children during the 2014-2015 Seasonal Influenza Epidemic. *J Infect Dis*. doi:10.1093/infdis/jiw104
- Mullooly JP, Bridges CB, Thompson WW, Chen J, Weintraub E, Jackson LA, Black S, Shay DK. 2007. Influenza- and RSV-associated hospitalizations among adults. *Vaccine* **25**:846–855. doi:10.1016/j.vaccine.2006.09.041
- Ndeffo Mbah ML, Medlock J, Meyers LA, Galvani AP, Townsend JP. 2013. Optimal targeting of seasonal influenza vaccination toward younger ages is robust to parameter uncertainty. *Vaccine*. doi:10.1016/j.vaccine.2013.04.052
- Piedra PA, Schulman KL, Blumentals WA. 2009. Effects of oseltamivir on influenza-related complications in children with chronic medical conditions. *Pediatrics*. doi:10.1542/peds.2008-0977
- Pitzer VE, Viboud C, Alonso WJ, Wilcox T, Metcalf CJ, Steiner CA, Haynes AK, Grenfell BT. 2015. Environmental Drivers of the Spatiotemporal Dynamics of Respiratory Syncytial Virus in the United States. *PLoS Pathog*. doi:10.1371/journal.ppat.1004591
- Population Distribution by Age | The Henry J. Kaiser Family Foundation. n.d. <https://www.kff.org/other/state-indicator/distribution-by-age/?currentTimeframe=1&sortModel=%7B%22colId%22:%22Location%22,%22sort%22:%22asc%22%7D>
- Ranjeva S, Subramanian R, Fang VJ, Leung GM, Ip DKM, Perera RAPM, Peiris JSM, Cowling BJ, Cobey S. 2019. Age-specific differences in the dynamics of protective immunity to influenza. *Nat Commun*. doi:10.1038/s41467-019-09652-6
- Rolfes MA, Foppa IM, Garg S, Flannery B, Brammer L, Singleton JA, Burns E, Jernigan D, Olsen SJ, Bresee J, Reed C. 2018. Annual estimates of the burden of seasonal influenza in the United States: A tool for strengthening influenza surveillance and preparedness. *Influenza Other Respiri Viruses*. doi:10.1111/irv.12486
- Sharabi S, Drori Y, Micheli M, Friedman N, Orzitzer S, Bassal R, Glatman-Freedman A, Shohat T, Mendelson E, Hindiyeh M, Mandelboim M. 2016. Epidemiological and virological characterization of influenza B virus infections. *PLoS One* **11**. doi:10.1371/journal.pone.0161195

- Stewart RJ, Flannery B, Chung JR, Gaglani M, Reis M, Zimmerman RK, Nowalk MP, Jackson L, Jackson ML, Monto AS, Martin ET, Belongia EA, McLean HQ, Fry AM, Havers FP. 2018. Influenza Antiviral Prescribing for Outpatients with an Acute Respiratory Illness and at High Risk for Influenza-Associated Complications during 5 Influenza Seasons-United States, 2011-2016. *Clin Infect Dis*. doi:10.1093/cid/cix922
- Tellier R. 2009. Aerosol transmission of influenza A virus: A review of new studies. *J R Soc Interface*. doi:10.1098/rsif.2009.0302.focus
- Tokars JI, Olsen SJ, Reed C. 2018. Seasonal Incidence of Symptomatic Influenza in the United States. *Clin Infect Dis*. doi:10.1093/cid/cix1060
- Use of Antivirals | CDC. n.d. <https://www.cdc.gov/flu/professionals/antivirals/antiviral-use-influenza.htm>
- Vynnycky E, White R. 2010. Introduction. The basics: infections, transmission and models. *An Introduction to Infectious Disease Modelling*.
- Yamin D, Gavius A, Solnik E, Davidovitch N, Balicer RD, Galvani AP, Pliskin JS. 2014. An Innovative Influenza Vaccination Policy: Targeting Last Season's Patients. *PLoS Comput Biol*. doi:10.1371/journal.pcbi.1003643
- Yamin D, Jones FK, DeVincenzo JP, Gertler S, Kobiler O, Townsend JP, Galvani AP. 2016. Vaccination strategies against respiratory syncytial virus. *Proc Natl Acad Sci U S A*. doi:10.1073/pnas.1522597113
